# Supplementary material for: NIR luminescence for the detection of metal ions and nitro explosives based on a grape-like nine-nuclear Nd(iii) nanocluster
Source: Royal Society of Chemistry journal article supplement (doi:10.1039/c8qi01166d), 2019-01-01
Supplement: c8qi01166d1.pdf [file c8qi01166d1.pdf]

## Supporting Information

### **NIR luminescence for the detection of metal ions and nitro explosives based on a grape-like nine-nuclear Nd(III) nanocluster**

Hongfen Chen, Xiaoping Yang, Dongmei Jiang, Desmond Schipper and Richard A. Jones

#### **Contents**

|                                                                                                                                                    |     |
|----------------------------------------------------------------------------------------------------------------------------------------------------|-----|
| 1. Materials and methods.....                                                                                                                      | S2  |
| 2. Synthesis of the Schiff base ligand H <sub>2</sub> L <sup>1</sup> .....                                                                         | S3  |
| 3. Powder XRD patterns of <b>1</b> and <b>2</b> .....                                                                                              | S4  |
| 4. The IR spectra of H <sub>2</sub> L <sup>1</sup> and <b>1-2</b> .....                                                                            | S5  |
| 5. The thermogravimetric analysis of <b>1</b> and <b>2</b> .....                                                                                   | S6  |
| 6. UV-Vis spectra of the mixture of H <sub>2</sub> L <sup>1</sup> and H <sub>2</sub> L <sup>2</sup> , and the clusters <b>1</b> and <b>2</b> ..... | S7  |
| 7. The excitation and visible emission spectra of H <sub>2</sub> L <sup>1</sup> and <b>2</b> .....                                                 | S8  |
| 8. The emission lifetimes of <b>1</b> and <b>2</b> .....                                                                                           | S9  |
| 9. NIR luminescence sensing of <b>1</b> towards metal ions.....                                                                                    | S10 |
| 10. Visible emission response of <b>1</b> to metal ions and HMX.....                                                                               | S13 |
| 11. UV-Vis spectra of <b>1</b> with the additional of Zn <sup>2+</sup> ion and HMX.....                                                            | S14 |
| 12. The structures of explosives.....                                                                                                              | S15 |
| 13. NIR luminescence sensing of <b>1</b> towards nitro explosives.....                                                                             | S16 |
| 14. MS(ESI) spectrum of <b>1</b> before and after the addition of Cd <sup>2+</sup> ion.....                                                        | S18 |
| 15. X-Ray Crystallography.....                                                                                                                     | S19 |

## **1. Materials and methods**

The reagents and solvents were purchased from standard commercial suppliers.  $^1\text{H}$  (500 MHz) NMR spectra were recorded on a AVANCE III AV500 spectrometer at 298 K. Elemental analyses for C, H, and N were performed on a EURO EA3000 elemental analysis. Melting points were determined on a Büchi melting point apparatus and are uncorrected. Powder XRD spectra were obtained on a D8ADVANCE diffractometer. Infrared and electronic absorption spectra were carried out on a Nicolet IS10 spectrometer and UV-3600 spectrophotometer, respectively. Conductivity measurements were carried out with a DDS-11 conductivity bridge. Field emission scanning electron microscopy (FESEM) images and energy dispersive X-ray spectroscopy (EDX) spectra were acquired on a Nova NanoSEM 200 scanning electron microscope.

**Photophysical Studies** Visible and NIR luminescence spectra were recorded on a FLS 980 fluorimeter. The light source for the spectra was a 450 W xenon arc lamp with continuous spectral distribution from 190 to 2600 nm. Liquid nitrogen cooled Ge PIN diode detector was used to detect the NIR emissions from 800 nm to 1700 nm. The temporal decay curves of the fluorescence signals were stored by using the attached storage digital oscilloscope. The quantum yields ( $\Phi_{\text{em}}$ ) were obtained by using an integrating sphere, according to eqn  $\Phi_{\text{em}} = N_{\text{em}} / N_{\text{abs}}$ , where  $N_{\text{em}}$  and  $N_{\text{abs}}$  are the numbers of emitted and absorbed photons, respectively. Systematic errors have been deducted through the standard instrument corrections. All the measurements were carried out at room temperature.

## 2. Synthesis of the Schiff base ligand H<sub>2</sub>L<sup>1</sup>

2-Hydroxy-2-methoxybenzaldehyde (5.0 mmol, 0.7608 g) was dissolved in 10 mL EtOH, and a solution of 4-{3-[4-(2-amino-ethyl)-phenoxy]-phenoxy}-phenylamine (2.5 mmol, 0.8010 g) in 20 mL EtOH was then added drop by drop. The resulting solution was stirred and heated under reflux for 3.5 hours. It was allowed to cool and was then filtered. The solid was washed with EtOH (3×5 ml) and then dried in the air at room temperature to give orange product. Yield (based on 4-{3-[4-(2-amino-ethyl)-phenoxy]-phenoxy}-phenylamine): 1.4128 g (96%). m.p. = 139.2°C. Elemental analysis: Found: C, 73.50; H, 5.58; N, 4.80%. Calc. for C<sub>36</sub>H<sub>32</sub>N<sub>2</sub>O<sub>6</sub>: C, 73.45; H, 5.48; N, 4.76%. IR (CH<sub>3</sub>CN, cm<sup>-1</sup>): 1610 (m), 1447 (s), 1241 (s), 1170 (m), 1130 (w), 1092 (w), 950 (m), 836 (m), 772 (m), 730 (m), 686 (m). <sup>1</sup>H NMR (500 MHz, DMSO) δ = 13.20 (s, 2H), 8.96 (s, 2H), 7.49 (d, 2H), 7.42 (t, 3H), 7.22 (d, 2H), 7.15 (dd, 4H), 6.91 (t, 3H), 6.81 (dd, 2H), 6.71 (d, 2H), 3.82 (s, 6H), 1.34 (d, 4H).

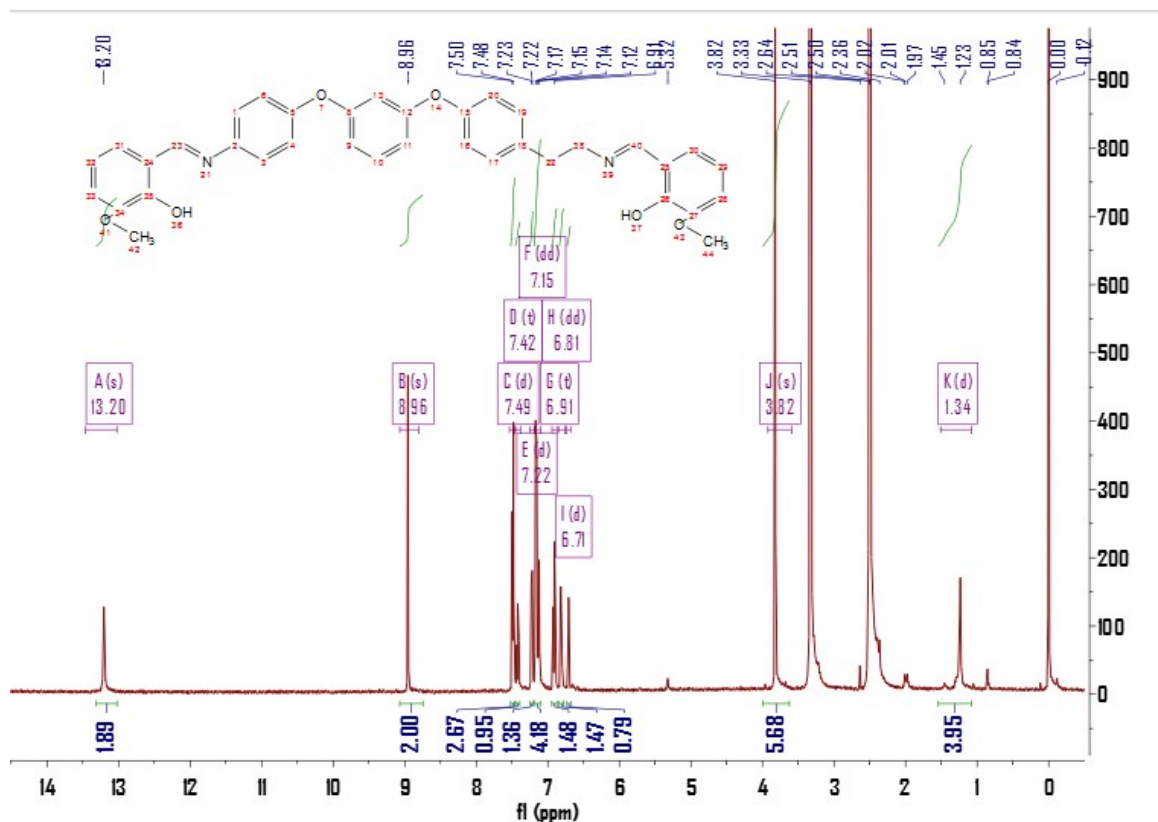

Figure S1. <sup>1</sup>H NMR spectrum of H<sub>2</sub>L<sup>1</sup> in DMSO.

### 3. Powder XRD patterns of 1 and 2

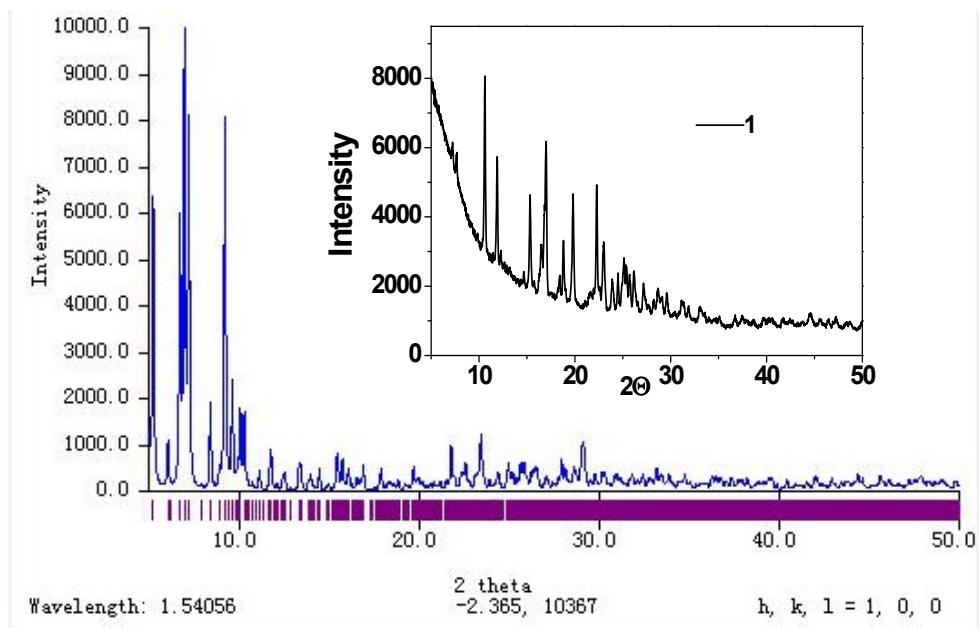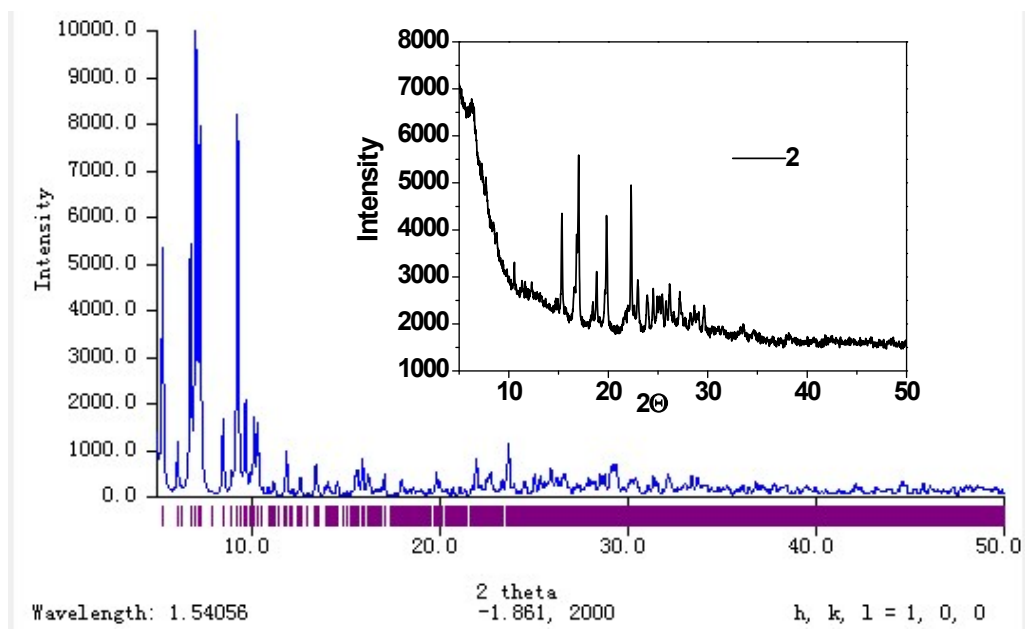

Figure S2. Powder XRD patterns of 1 and 2 (the insert pictures were obtained from experiments).

#### 4. The IR spectra of H<sub>2</sub>L<sup>1</sup> and 1-2

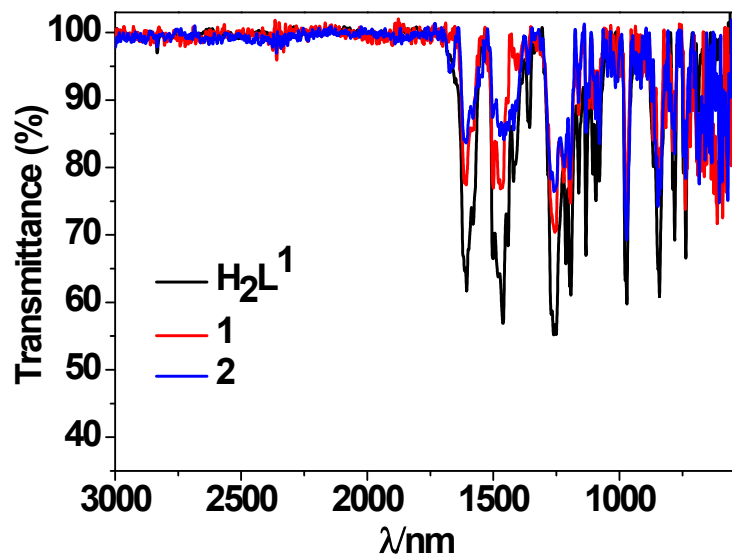

Figure S3. Infrared spectra of H<sub>2</sub>L<sup>1</sup> and 1-2 .

## 5. The thermogravimetric analysis of 1-2

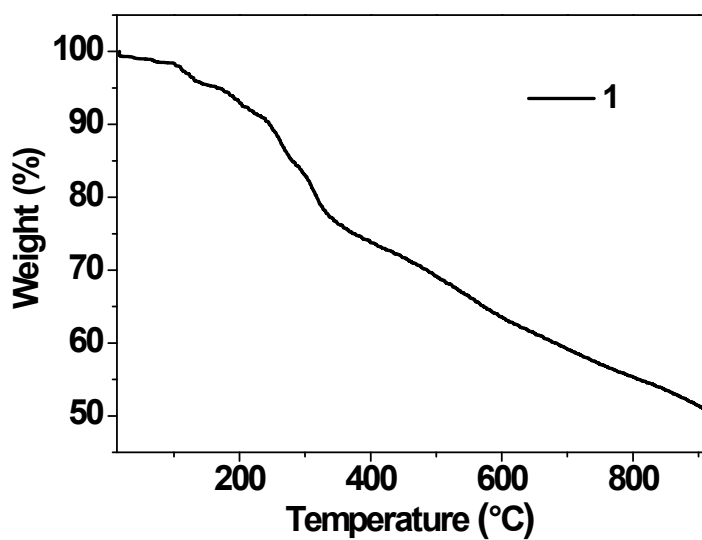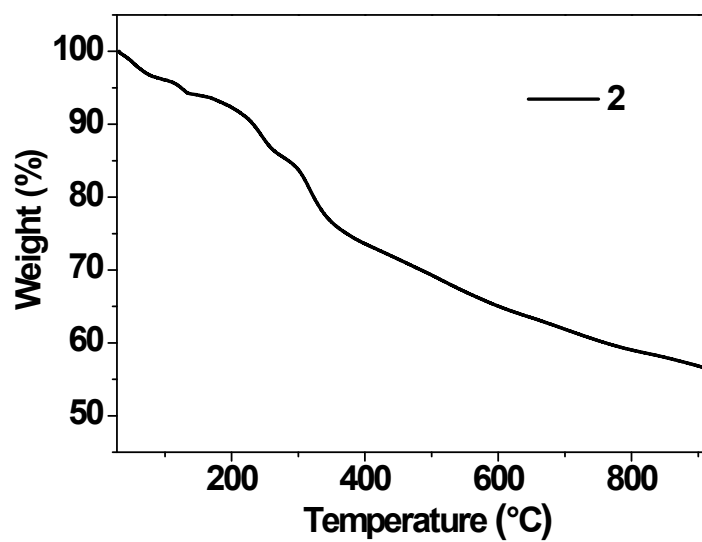

Figure S4. The thermogravimetric analysis of 1-2.

**6. UV-Vis spectra of the mixture of  $H_2L^1$  and  $H_2L^2$ , and the clusters 1 and 2**

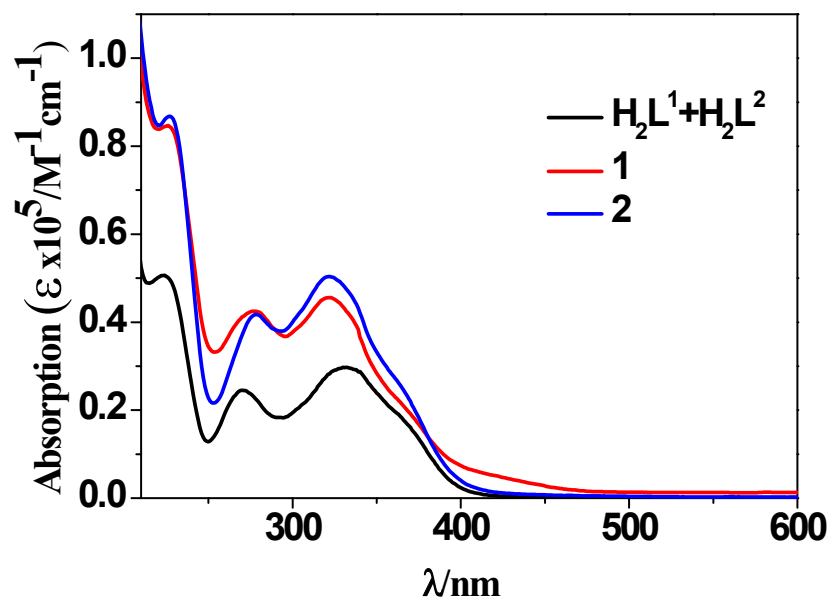

**Figure S5.** UV-Vis spectra of the mixture of  $H_2L^1$  and  $H_2L^2$ , and the clusters 1 and 2 in  $CH_3CN$ .

## 7. The excitation and visible emission spectra of $H_2L^1$ and **2**

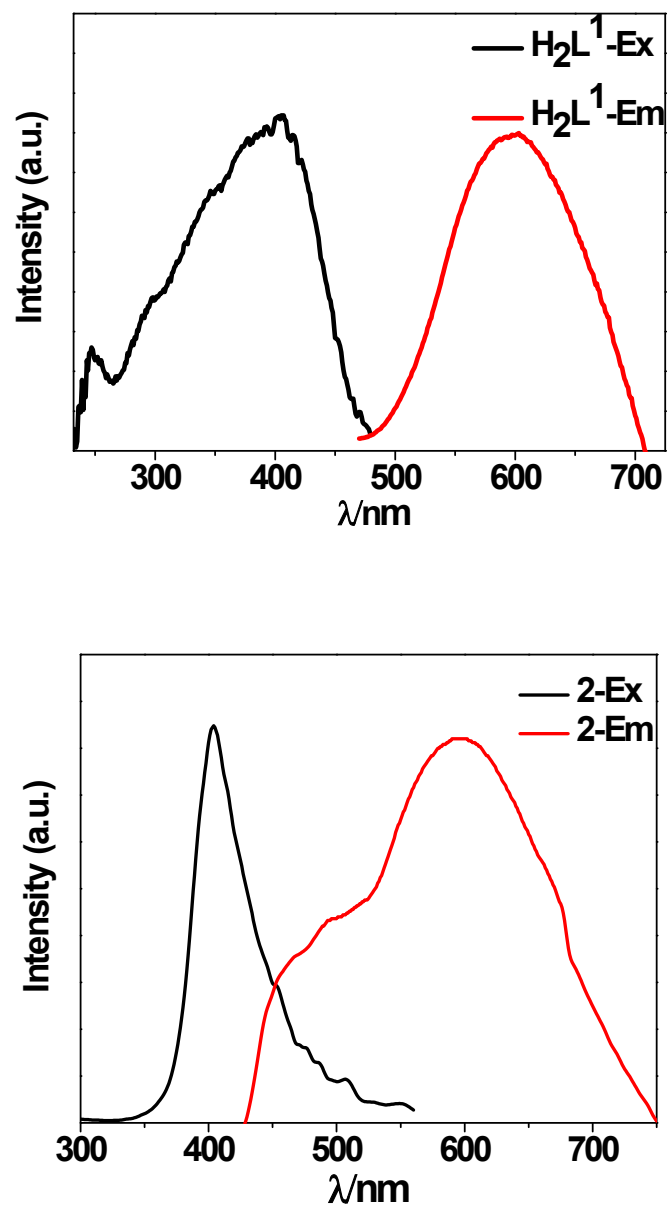

**Figure S6.** The excitation and visible emission spectra of  $H_2L^1$  and **2** in  $CH_3CN$ .



## 8. The emission lifetimes of 1 and 2

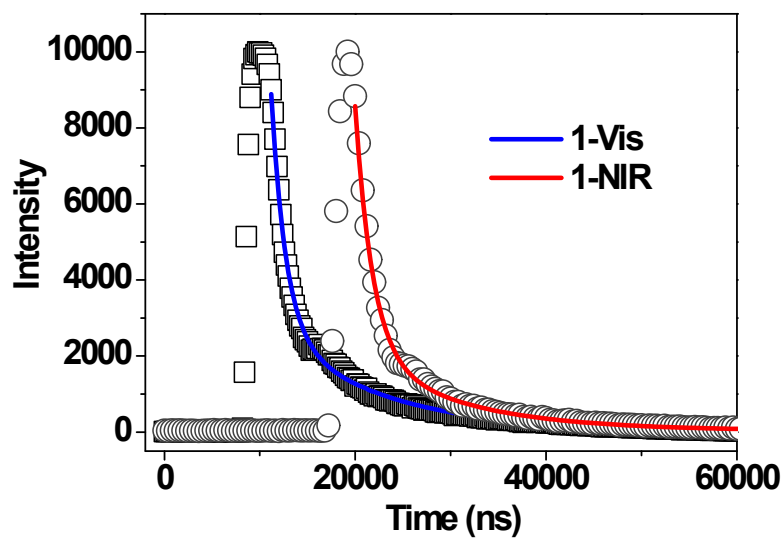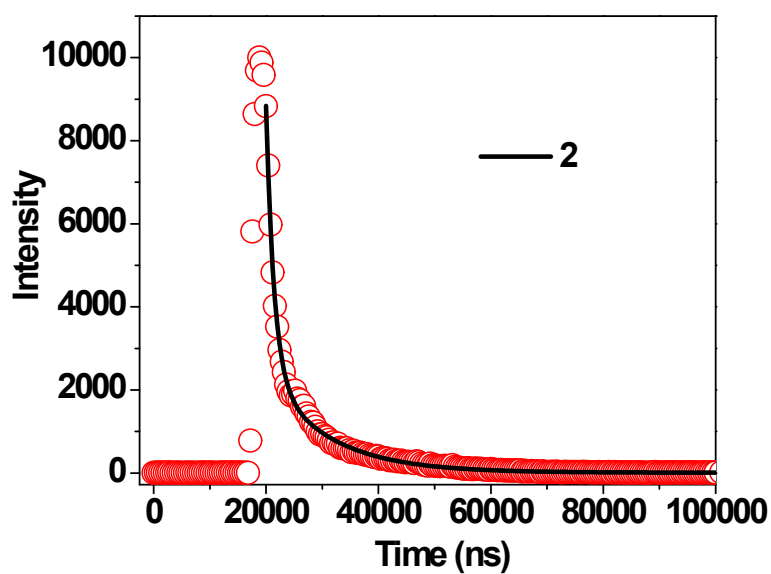

Figure S7. The visible and NIR emission lifetimes of 1 and 2 in CH<sub>3</sub>CN.

## 9. NIR luminescent sensing of 1 towards metal ions

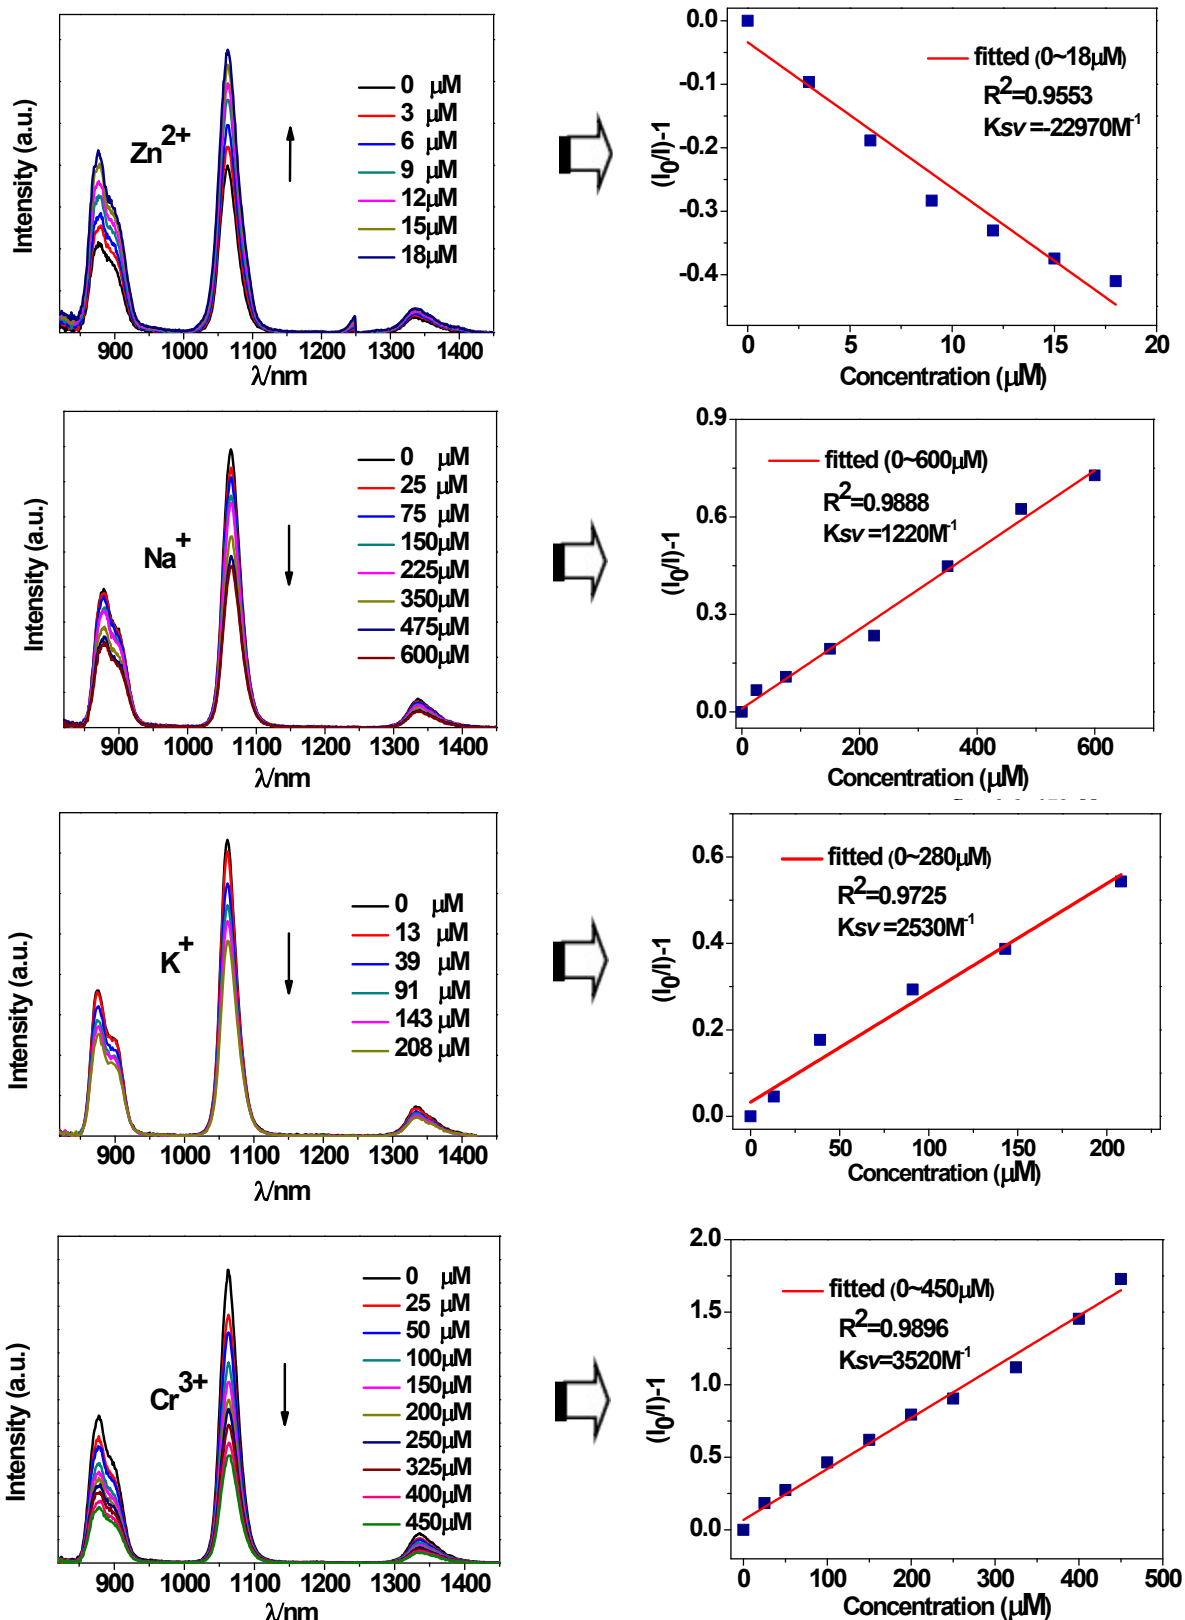

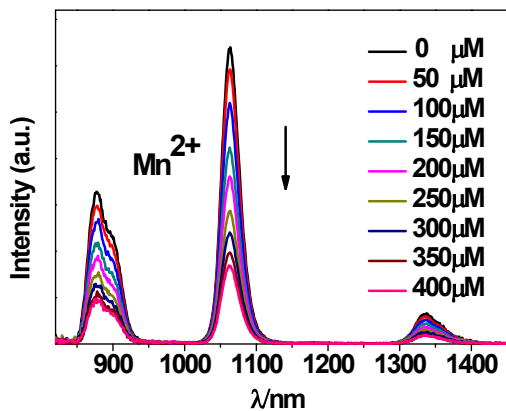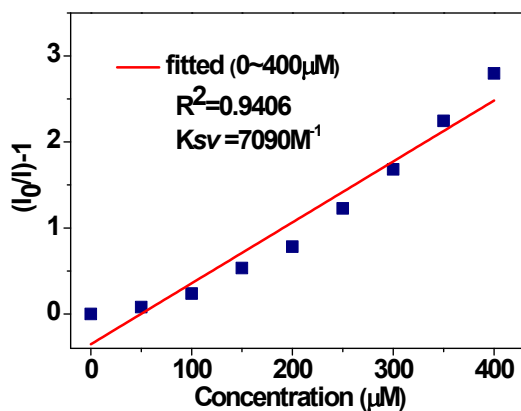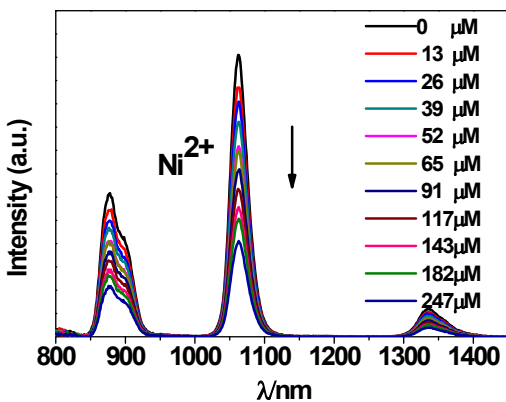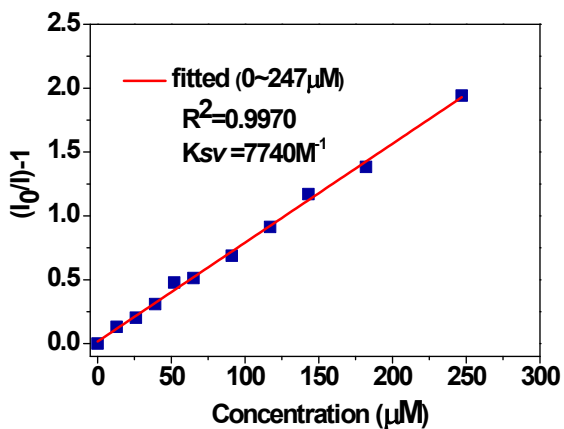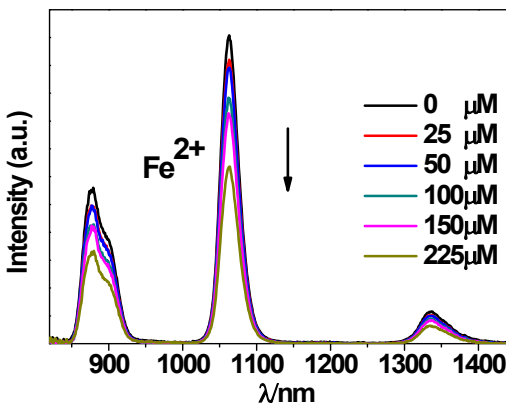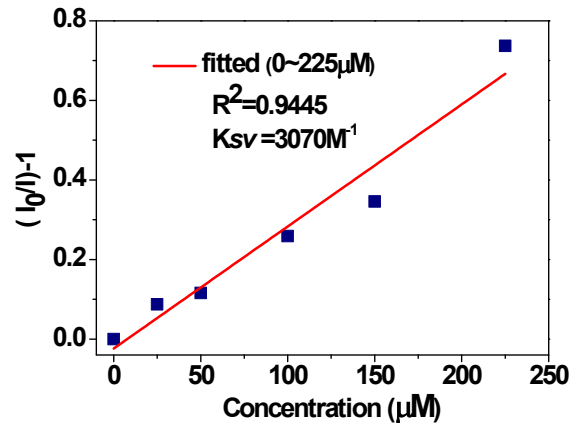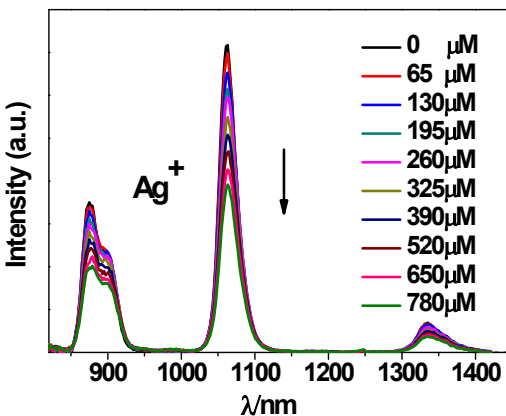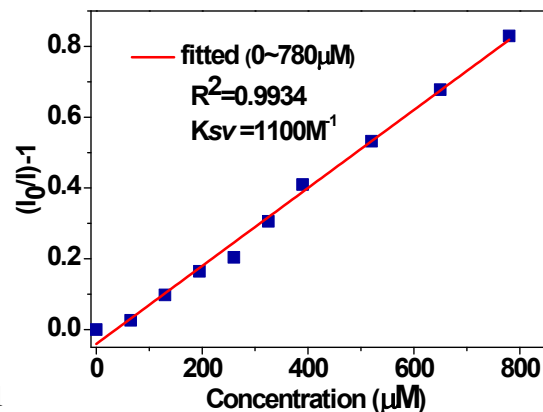

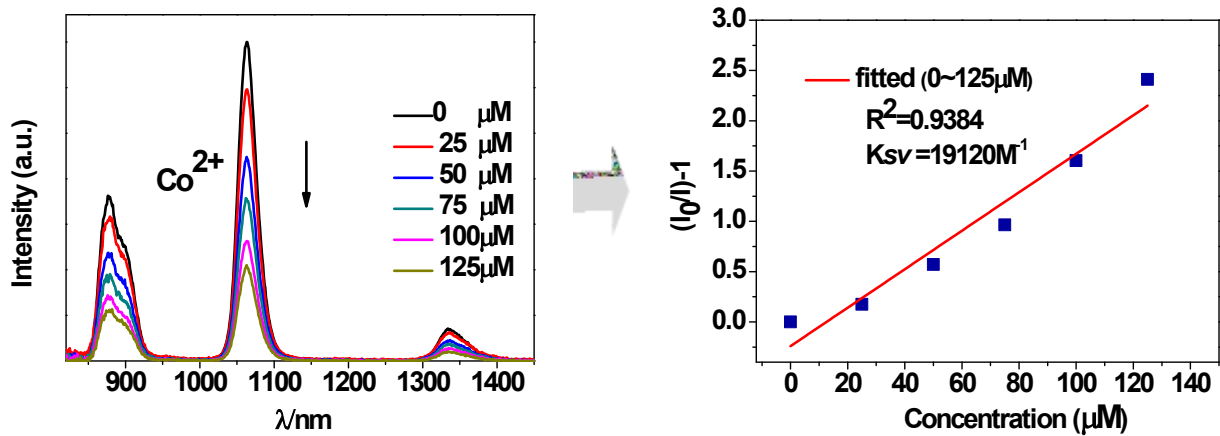

**Figure S8.** NIR luminescent sensing of **1** (60  $\mu\text{M}$ ) towards metal ions in DMF.

## 10. Visible emission response of 1 to metal ions and HMX

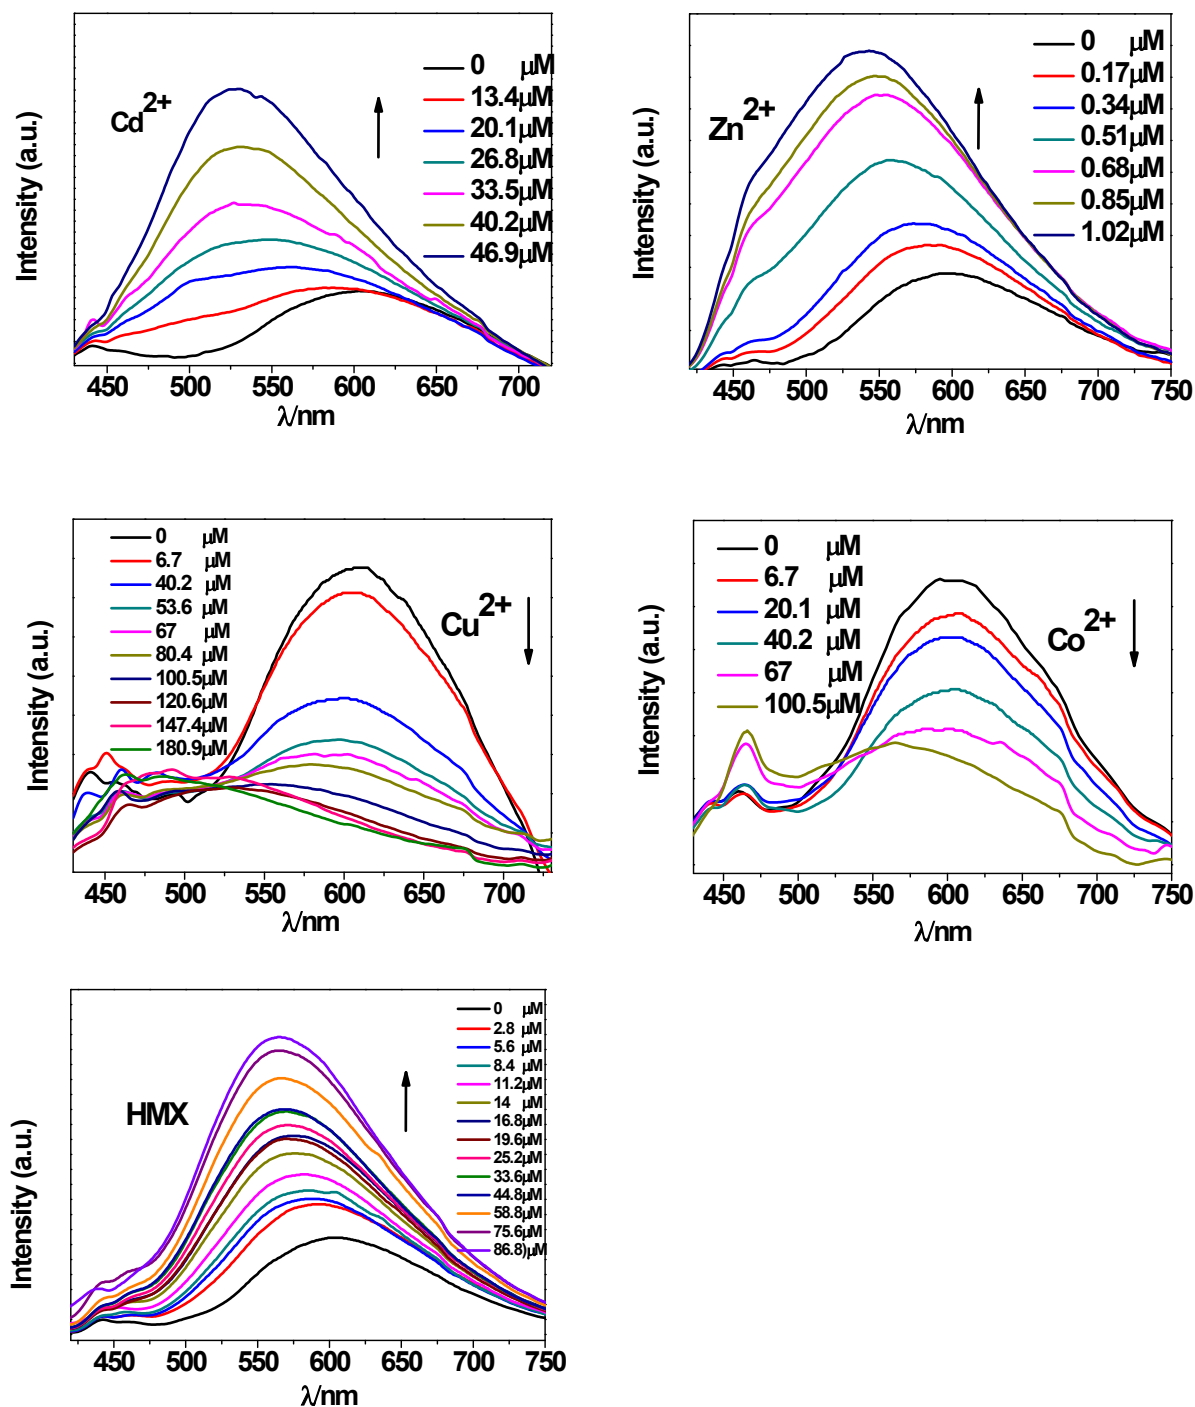

Figure S9. Visible emission response of 1 (60 μM) to metal ions and HMX

## 11. UV-Vis spectra of 1 with the additional of $Zn^{2+}$ ion and HMX

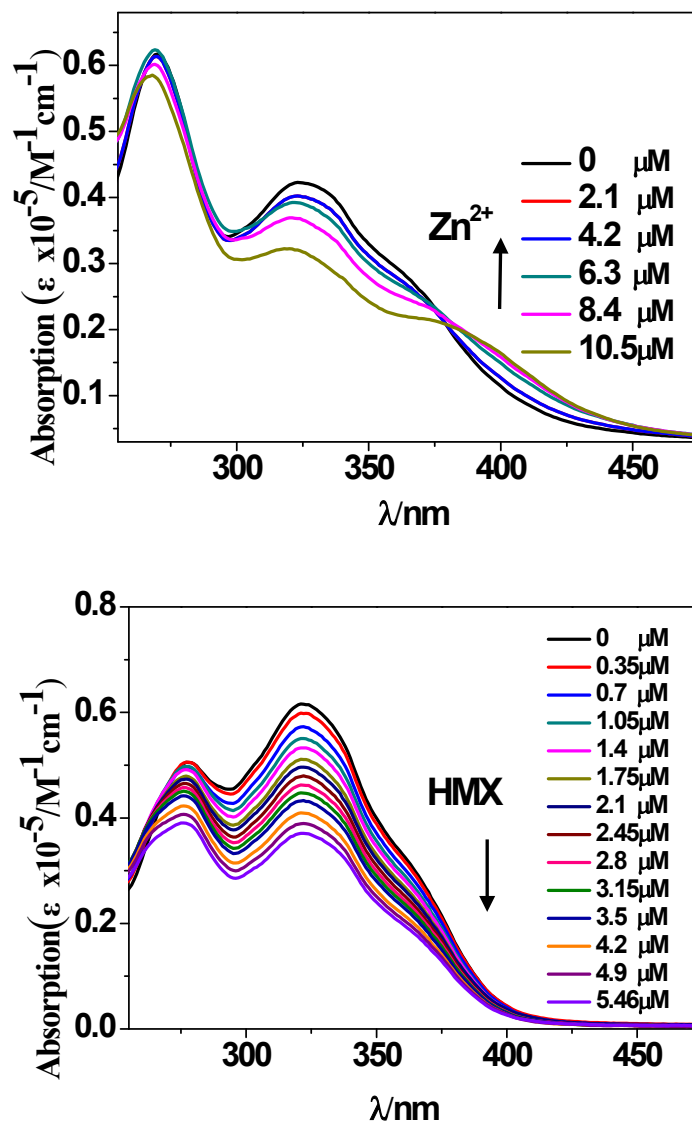

**Figure S10.** UV-Vis spectra of 1 (3  $\mu\text{M}$ ) with the additional of different concentrations of  $Zn^{2+}$  ion and HMX in DMF.

## 12. The structures of explosives

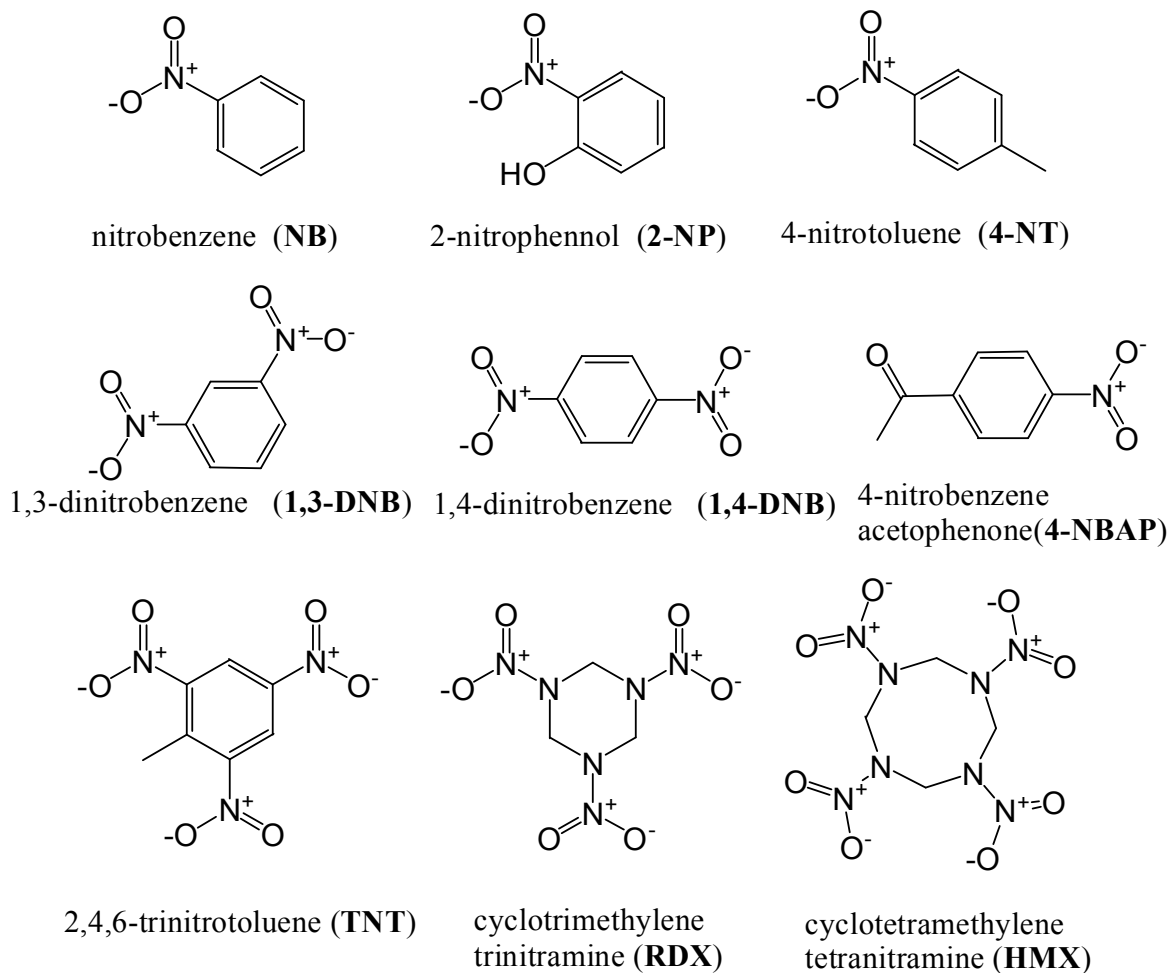

**Scheme S1.** The structures of explosives.

### 13. NIR luminescence sensing of 1 towards nitro explosives

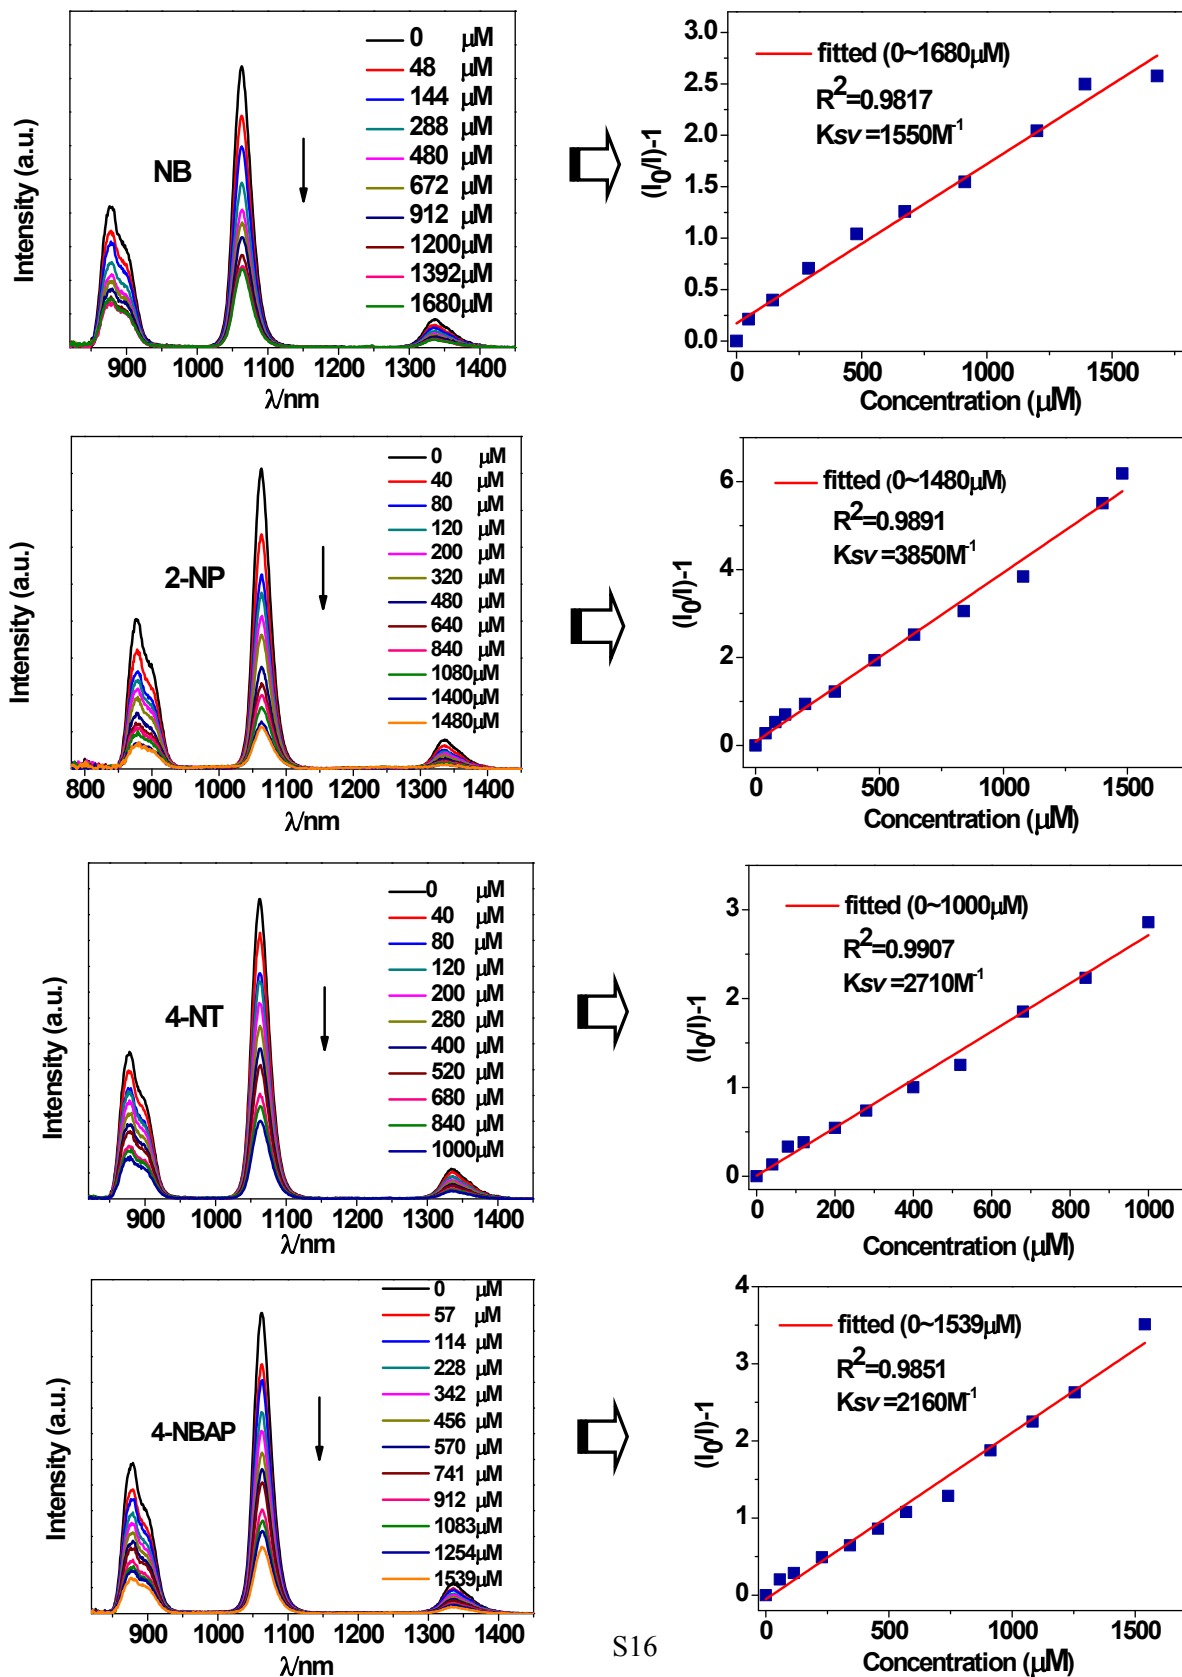



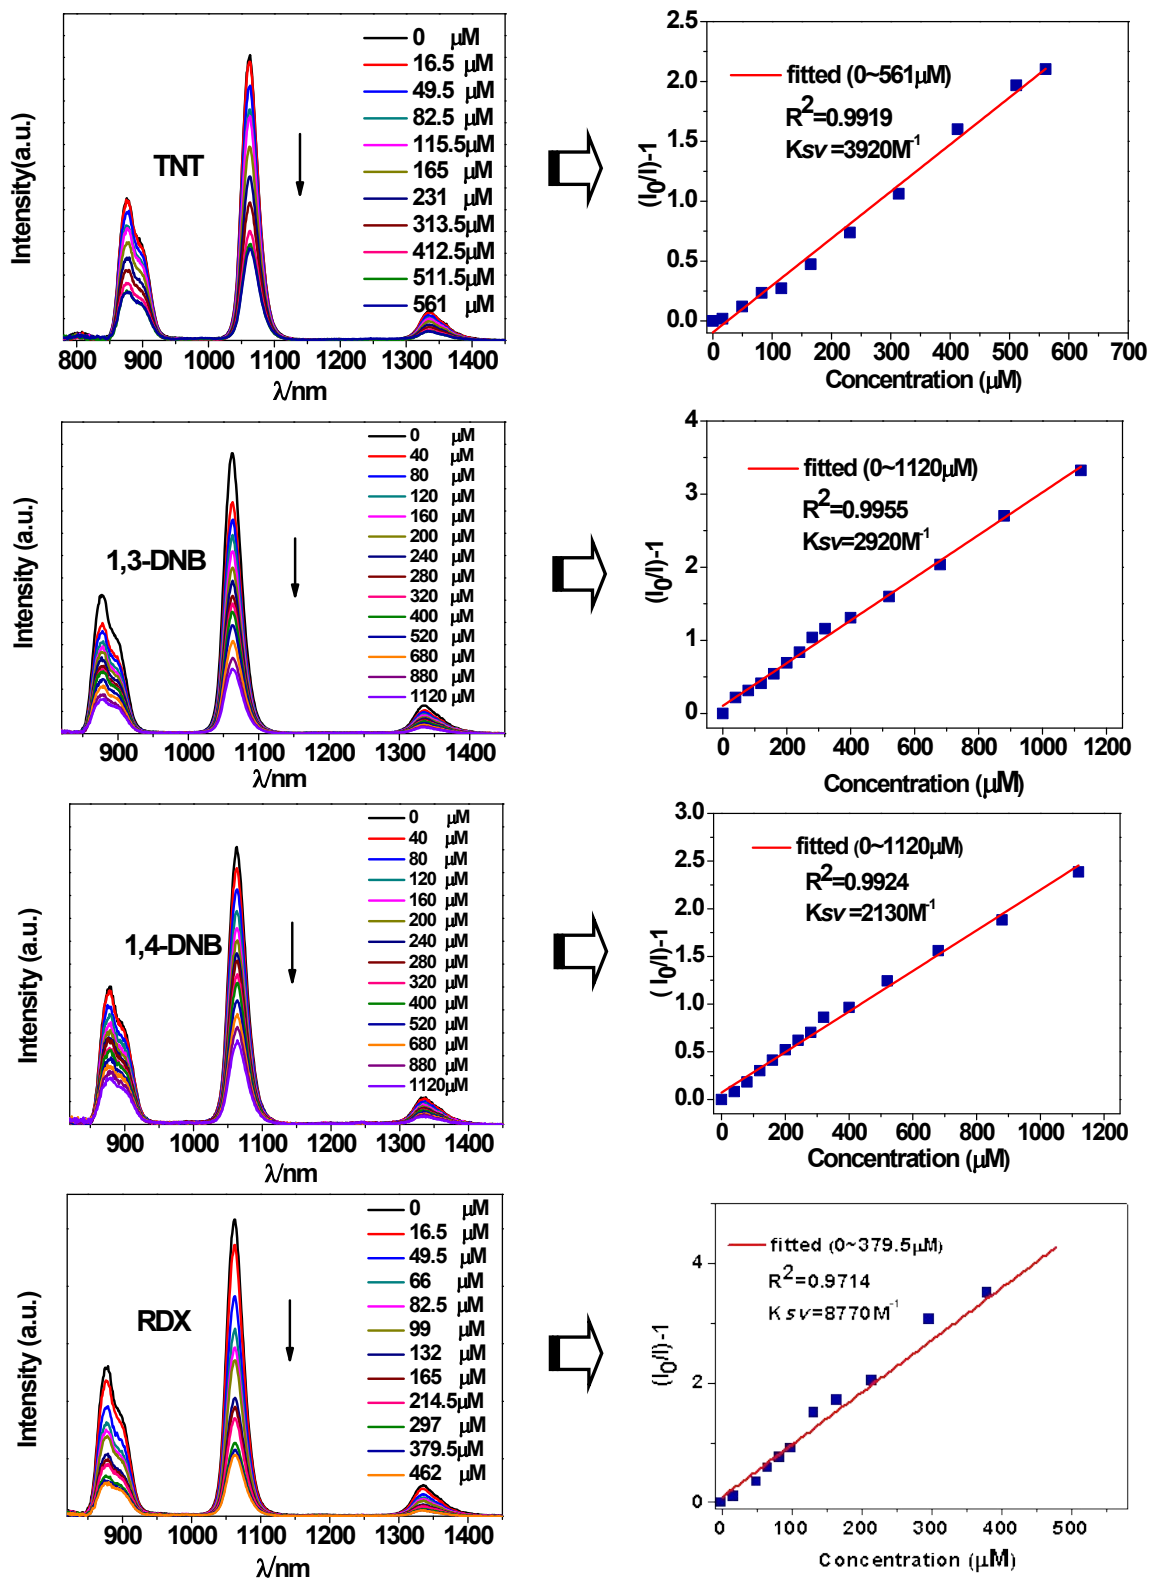

Figure S11. NIR luminescent sensing of **1** (60  $\mu\text{M}$ ) towards nitro explosives in  $\text{CH}_3\text{CN}$ .

## 14. MS(ESI) spectrum of 1 before and after the addition of Cd<sup>2+</sup> ion

CRO 975445-1  
Type: Unknown ID: Unknown Row: 1  
Sample Name:  
Sample Name:  
Lot #:  
MW:  
Sample Type:  
Operator: ZQ

CRO975445-1#1-34 RT: 0.01-0.77 AL 34 NL: 30354  
T: +c ESI Full ms [290.00-2000.00]

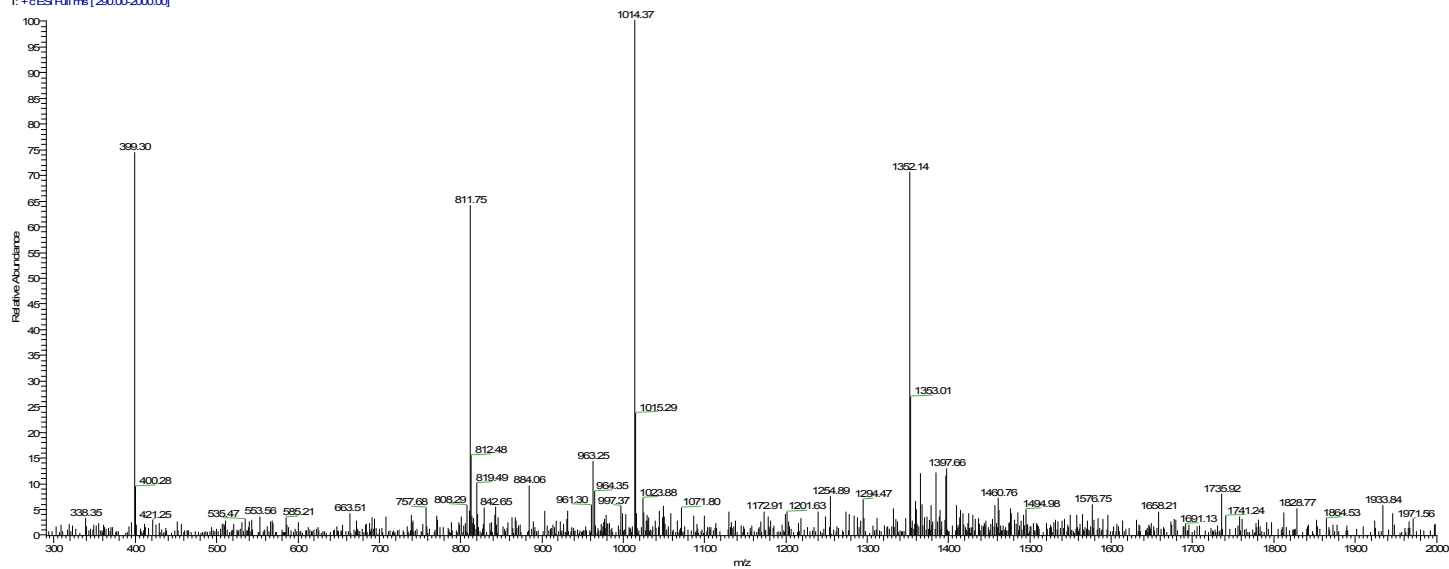

CRO 975445-2  
Type: Unknown ID: Unknown Row: 1  
Sample Name:  
Sample Name:  
Lot #:  
MW:  
Sample Type:  
Operator: ZQ

CRO975445-2#2-34 RT: 0.03-0.77 AL 33 NL: 94354  
T: +c ESI Full ms [290.00-2000.00]

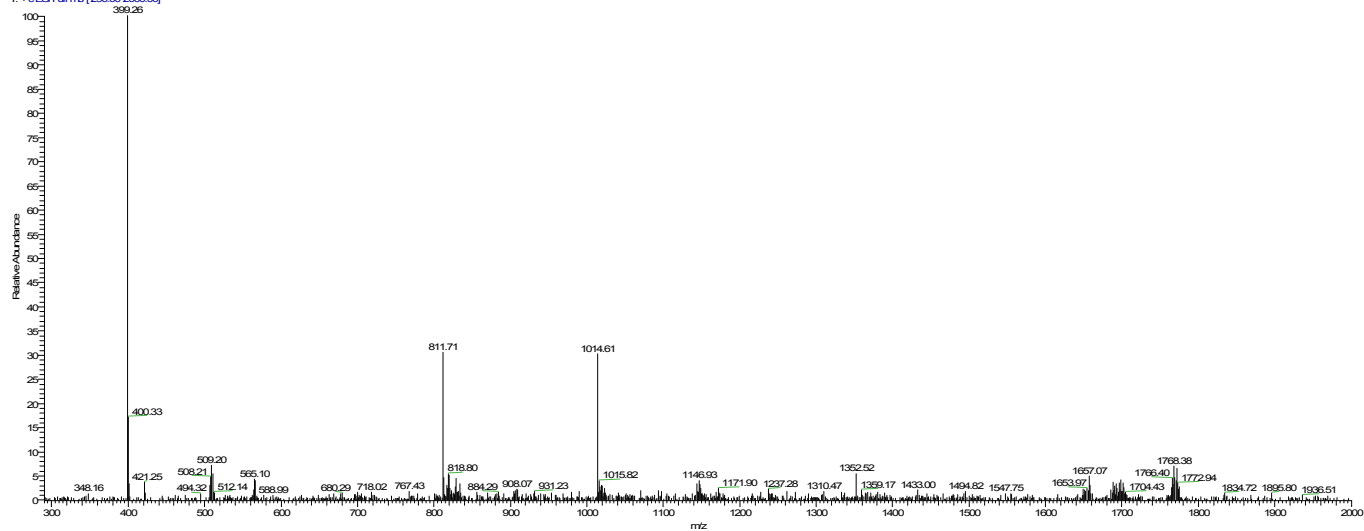

Figure S12. MS(ESI) spectra of 1 before (a) and after (b) the addition of Cd<sup>2+</sup> ion.

## 15. X-Ray Crystallography

**Table S1.** Selected bond lengths (Å) and angles (°) for **1**.

|             |           |                   |           |
|-------------|-----------|-------------------|-----------|
| Nd(1)-O(27) | 2.341(11) | Nd(6)-O(24)       | 2.540(11) |
| Nd(1)-O(34) | 2.389(9)  | Nd(6)-O(44)       | 2.599(12) |
| Nd(1)-O(50) | 2.398(9)  | Nd(7)-O(36)       | 2.363(12) |
| Nd(1)-O(33) | 2.402(9)  | Nd(7)-O(30)       | 2.367(10) |
| Nd(1)-O(35) | 2.411(11) | Nd(7)-O(50)       | 2.379(10) |
| Nd(1)-O(31) | 2.421(9)  | Nd(7)-O(35)       | 2.409(11) |
| Nd(1)-O(22) | 2.421(10) | Nd(7)-O(51)       | 2.411(10) |
| Nd(1)-O(20) | 2.462(9)  | Nd(7)-O(46)       | 2.418(11) |
| Nd(2)-O(2)  | 2.343(10) | Nd(7)-O(49)       | 2.437(10) |
| Nd(2)-O(43) | 2.349(10) | Nd(7)-O(11)       | 2.445(11) |
| Nd(2)-O(33) | 2.370(10) | Nd(8)-O(51)       | 2.351(10) |
| Nd(2)-O(41) | 2.402(10) | Nd(8)-O(47)       | 2.367(12) |
| Nd(2)-O(6)  | 2.405(10) | Nd(8)-O(13)       | 2.390(14) |
| Nd(2)-O(42) | 2.442(11) | Nd(8)-O(8)        | 2.392(13) |
| Nd(2)-O(34) | 2.493(9)  | Nd(8)-O(9)        | 2.455(14) |
| Nd(2)-N(1)  | 2.592(14) | Nd(8)-O(45)       | 2.461(13) |
| Nd(2)-O(7)  | 2.727(11) | Nd(8)-O(10)       | 2.492(12) |
| Nd(3)-O(51) | 2.334(10) | Nd(8)-O(11)       | 2.588(11) |
| Nd(3)-O(18) | 2.340(12) | Nd(8)-O(14)       | 2.629(11) |
| Nd(3)-O(16) | 2.371(11) | Nd(9)-O(3)        | 2.308(12) |
| Nd(3)-O(12) | 2.394(13) | Nd(9)-O(48)       | 2.331(13) |
| Nd(3)-O(20) | 2.437(9)  | Nd(9)-O(31)       | 2.335(10) |
| Nd(3)-O(14) | 2.446(11) | Nd(9)-O(30)       | 2.400(11) |
| Nd(3)-O(22) | 2.458(10) | Nd(9)-O(29)       | 2.408(17) |
| Nd(3)-O(21) | 2.587(12) | Nd(9)-O(38)       | 2.409(13) |
| Nd(3)-O(13) | 2.794(16) | Nd(9)-O(35)       | 2.426(11) |
| Nd(4)-O(15) | 2.340(12) | Nd(9)-O(4)        | 2.575(11) |
| Nd(4)-O(20) | 2.354(9)  | O(27)-Nd(1)-O(34) | 79.5(4)   |
| Nd(4)-O(33) | 2.373(9)  | O(27)-Nd(1)-O(50) | 141.5(4)  |
| Nd(4)-O(2)  | 2.432(10) | O(34)-Nd(1)-O(50) | 79.5(3)   |
| Nd(4)-O(40) | 2.439(12) | O(27)-Nd(1)-O(33) | 81.1(3)   |
| Nd(4)-O(19) | 2.449(14) | O(34)-Nd(1)-O(33) | 72.1(3)   |
| Nd(4)-O(18) | 2.481(12) | O(50)-Nd(1)-O(33) | 121.7(3)  |
| Nd(4)-O(41) | 2.542(11) | O(27)-Nd(1)-O(35) | 111.5(4)  |
| Nd(4)-O(1)  | 2.598(11) | O(34)-Nd(1)-O(35) | 143.1(4)  |
| Nd(5)-O(37) | 2.337(12) | O(50)-Nd(1)-O(35) | 70.5(4)   |
| Nd(5)-O(25) | 2.361(11) | O(33)-Nd(1)-O(35) | 142.6(4)  |
| Nd(5)-O(31) | 2.374(9)  | O(27)-Nd(1)-O(31) | 75.9(4)   |
| Nd(5)-O(39) | 2.382(13) | O(34)-Nd(1)-O(31) | 81.7(3)   |
| Nd(5)-O(50) | 2.420(10) | O(50)-Nd(1)-O(31) | 69.4(3)   |
| Nd(5)-O(30) | 2.424(10) | O(33)-Nd(1)-O(31) | 147.8(3)  |
| Nd(5)-O(24) | 2.438(11) | O(35)-Nd(1)-O(31) | 68.2(4)   |
| Nd(5)-O(32) | 2.446(11) | O(27)-Nd(1)-O(22) | 81.8(4)   |
| Nd(6)-O(34) | 2.321(9)  | O(34)-Nd(1)-O(22) | 144.3(3)  |
| Nd(6)-O(28) | 2.369(11) | O(50)-Nd(1)-O(22) | 131.2(3)  |
| Nd(6)-O(5)  | 2.414(11) | O(33)-Nd(1)-O(22) | 75.2(3)   |
| Nd(6)-O(23) | 2.418(11) | O(35)-Nd(1)-O(22) | 72.3(4)   |
| Nd(6)-O(6)  | 2.426(9)  | O(31)-Nd(1)-O(22) | 122.5(3)  |
| Nd(6)-O(26) | 2.444(11) | O(27)-Nd(1)-O(20) | 141.1(3)  |
| Nd(6)-O(43) | 2.476(10) | O(34)-Nd(1)-O(20) | 110.8(3)  |

|                   |          |                   |          |
|-------------------|----------|-------------------|----------|
| O(50)-Nd(1)-O(20) | 76.9(3)  | O(20)-Nd(3)-O(14) | 75.7(3)  |
| O(33)-Nd(1)-O(20) | 67.9(3)  | O(51)-Nd(3)-O(22) | 106.3(3) |
| O(35)-Nd(1)-O(20) | 83.1(3)  | O(18)-Nd(3)-O(22) | 78.1(4)  |
| O(31)-Nd(1)-O(20) | 141.3(3) | O(16)-Nd(3)-O(22) | 76.2(4)  |
| O(22)-Nd(1)-O(20) | 68.3(3)  | O(12)-Nd(3)-O(22) | 131.3(4) |
| O(2)-Nd(2)-O(43)  | 142.9(4) | O(20)-Nd(3)-O(22) | 68.1(3)  |
| O(2)-Nd(2)-O(33)  | 71.2(3)  | O(14)-Nd(3)-O(22) | 142.8(3) |
| O(43)-Nd(2)-O(33) | 140.9(3) | O(51)-Nd(3)-O(21) | 139.8(4) |
| O(2)-Nd(2)-O(41)  | 73.1(4)  | O(18)-Nd(3)-O(21) | 72.0(4)  |
| O(43)-Nd(2)-O(41) | 99.2(4)  | O(16)-Nd(3)-O(21) | 72.8(4)  |
| O(33)-Nd(2)-O(41) | 68.5(3)  | O(12)-Nd(3)-O(21) | 80.1(4)  |
| O(2)-Nd(2)-O(6)   | 140.2(4) | O(20)-Nd(3)-O(21) | 113.8(3) |
| O(43)-Nd(2)-O(6)  | 68.4(3)  | O(14)-Nd(3)-O(21) | 147.5(4) |
| O(33)-Nd(2)-O(6)  | 95.4(3)  | O(22)-Nd(3)-O(21) | 51.3(3)  |
| O(41)-Nd(2)-O(6)  | 137.9(4) | O(51)-Nd(3)-O(13) | 64.1(4)  |
| O(2)-Nd(2)-O(42)  | 73.7(4)  | O(18)-Nd(3)-O(13) | 126.1(5) |
| O(43)-Nd(2)-O(42) | 69.6(4)  | O(16)-Nd(3)-O(13) | 76.0(4)  |
| O(33)-Nd(2)-O(42) | 132.4(4) | O(12)-Nd(3)-O(13) | 49.0(4)  |
| O(41)-Nd(2)-O(42) | 71.3(4)  | O(20)-Nd(3)-O(13) | 128.2(4) |
| O(6)-Nd(2)-O(42)  | 131.9(4) | O(14)-Nd(3)-O(13) | 62.0(4)  |
| O(2)-Nd(2)-O(34)  | 133.4(3) | O(22)-Nd(3)-O(13) | 152.1(4) |
| O(43)-Nd(2)-O(34) | 70.1(3)  | O(21)-Nd(3)-O(13) | 118.0(4) |
| O(33)-Nd(2)-O(34) | 70.8(3)  | O(15)-Nd(4)-O(20) | 81.3(4)  |
| O(41)-Nd(2)-O(34) | 68.6(3)  | O(15)-Nd(4)-O(33) | 148.7(3) |
| O(6)-Nd(2)-O(34)  | 69.4(3)  | O(20)-Nd(4)-O(33) | 70.2(3)  |
| O(42)-Nd(2)-O(34) | 115.9(3) | O(15)-Nd(4)-O(2)  | 141.3(4) |
| O(2)-Nd(2)-N(1)   | 74.2(4)  | O(20)-Nd(4)-O(2)  | 136.1(3) |
| O(43)-Nd(2)-N(1)  | 90.7(4)  | O(33)-Nd(4)-O(2)  | 69.6(3)  |
| O(33)-Nd(2)-N(1)  | 124.1(4) | O(15)-Nd(4)-O(40) | 73.8(4)  |
| O(41)-Nd(2)-N(1)  | 137.4(4) | O(20)-Nd(4)-O(40) | 89.8(4)  |
| O(6)-Nd(2)-N(1)   | 84.3(4)  | O(33)-Nd(4)-O(40) | 117.5(4) |
| O(42)-Nd(2)-N(1)  | 73.8(4)  | O(2)-Nd(4)-O(40)  | 93.4(4)  |
| O(34)-Nd(2)-N(1)  | 151.6(4) | O(15)-Nd(4)-O(19) | 89.9(5)  |
| O(2)-Nd(2)-O(7)   | 80.0(4)  | O(20)-Nd(4)-O(19) | 121.6(4) |
| O(43)-Nd(2)-O(7)  | 125.0(3) | O(33)-Nd(4)-O(19) | 94.1(4)  |
| O(33)-Nd(2)-O(7)  | 65.7(3)  | O(2)-Nd(4)-O(19)  | 78.3(4)  |
| O(41)-Nd(2)-O(7)  | 132.3(4) | O(40)-Nd(4)-O(19) | 142.4(5) |
| O(6)-Nd(2)-O(7)   | 60.5(3)  | O(15)-Nd(4)-O(18) | 70.8(4)  |
| O(42)-Nd(2)-O(7)  | 136.6(4) | O(20)-Nd(4)-O(18) | 71.0(4)  |
| O(34)-Nd(2)-O(7)  | 107.3(3) | O(33)-Nd(4)-O(18) | 87.4(4)  |
| N(1)-Nd(2)-O(7)   | 66.0(4)  | O(2)-Nd(4)-O(18)  | 123.5(4) |
| O(51)-Nd(3)-O(18) | 142.8(4) | O(40)-Nd(4)-O(18) | 141.8(4) |
| O(51)-Nd(3)-O(16) | 69.1(4)  | O(19)-Nd(4)-O(18) | 51.9(4)  |
| O(18)-Nd(3)-O(16) | 144.4(4) | O(15)-Nd(4)-O(41) | 121.6(4) |
| O(51)-Nd(3)-O(12) | 113.1(4) | O(20)-Nd(4)-O(41) | 79.0(3)  |
| O(18)-Nd(3)-O(12) | 86.9(5)  | O(33)-Nd(4)-O(41) | 66.2(3)  |
| O(16)-Nd(3)-O(12) | 91.9(5)  | O(2)-Nd(4)-O(41)  | 69.2(4)  |
| O(51)-Nd(3)-O(20) | 75.6(3)  | O(40)-Nd(4)-O(41) | 51.9(4)  |
| O(18)-Nd(3)-O(20) | 72.0(4)  | O(19)-Nd(4)-O(41) | 146.1(4) |
| O(16)-Nd(3)-O(20) | 119.0(4) | O(18)-Nd(4)-O(41) | 145.5(4) |
| O(12)-Nd(3)-O(20) | 148.3(4) | O(15)-Nd(4)-O(1)  | 78.6(4)  |
| O(51)-Nd(3)-O(14) | 71.8(4)  | O(20)-Nd(4)-O(1)  | 157.4(4) |
| O(18)-Nd(3)-O(14) | 82.8(4)  | O(33)-Nd(4)-O(1)  | 131.6(3) |
| O(16)-Nd(3)-O(14) | 131.8(4) | O(2)-Nd(4)-O(1)   | 62.8(4)  |
| O(12)-Nd(3)-O(14) | 78.4(4)  | O(40)-Nd(4)-O(1)  | 74.9(4)  |

|                   |          |                   |          |
|-------------------|----------|-------------------|----------|
| O(19)-Nd(4)-O(1)  | 68.7(4)  | O(23)-Nd(6)-O(24) | 51.9(4)  |
| O(18)-Nd(4)-O(1)  | 111.2(4) | O(6)-Nd(6)-O(24)  | 140.9(3) |
| O(41)-Nd(4)-O(1)  | 103.1(4) | O(26)-Nd(6)-O(24) | 67.8(4)  |
| O(37)-Nd(5)-O(25) | 85.4(4)  | O(43)-Nd(6)-O(24) | 133.8(3) |
| O(37)-Nd(5)-O(31) | 144.7(4) | O(34)-Nd(6)-O(44) | 129.2(4) |
| O(25)-Nd(5)-O(31) | 109.4(3) | O(28)-Nd(6)-O(44) | 145.8(4) |
| O(37)-Nd(5)-O(39) | 95.3(5)  | O(5)-Nd(6)-O(44)  | 70.3(4)  |
| O(25)-Nd(5)-O(39) | 146.2(4) | O(23)-Nd(6)-O(44) | 81.6(4)  |
| O(31)-Nd(5)-O(39) | 89.3(4)  | O(6)-Nd(6)-O(44)  | 100.6(4) |
| O(37)-Nd(5)-O(50) | 86.1(4)  | O(26)-Nd(6)-O(44) | 66.9(4)  |
| O(25)-Nd(5)-O(50) | 71.3(3)  | O(43)-Nd(6)-O(44) | 60.9(3)  |
| O(31)-Nd(5)-O(50) | 69.9(3)  | O(24)-Nd(6)-O(44) | 118.4(4) |
| O(39)-Nd(5)-O(50) | 142.5(4) | O(36)-Nd(7)-O(30) | 77.1(4)  |
| O(37)-Nd(5)-O(30) | 77.1(4)  | O(36)-Nd(7)-O(50) | 87.1(4)  |
| O(25)-Nd(5)-O(30) | 138.0(4) | O(30)-Nd(7)-O(50) | 71.3(4)  |
| O(31)-Nd(5)-O(30) | 70.5(4)  | O(36)-Nd(7)-O(35) | 144.5(4) |
| O(39)-Nd(5)-O(30) | 74.1(4)  | O(30)-Nd(7)-O(35) | 69.7(4)  |
| O(50)-Nd(5)-O(30) | 69.7(3)  | O(50)-Nd(7)-O(35) | 70.9(3)  |
| O(37)-Nd(5)-O(24) | 146.0(4) | O(36)-Nd(7)-O(51) | 143.3(4) |
| O(25)-Nd(5)-O(24) | 77.6(4)  | O(30)-Nd(7)-O(51) | 138.3(3) |
| O(31)-Nd(5)-O(24) | 69.3(3)  | O(50)-Nd(7)-O(51) | 110.8(3) |
| O(39)-Nd(5)-O(24) | 83.7(4)  | O(35)-Nd(7)-O(51) | 72.0(4)  |
| O(50)-Nd(5)-O(24) | 115.1(3) | O(36)-Nd(7)-O(46) | 80.9(4)  |
| O(30)-Nd(5)-O(24) | 133.8(4) | O(30)-Nd(7)-O(46) | 136.0(4) |
| O(37)-Nd(5)-O(32) | 73.6(5)  | O(50)-Nd(7)-O(46) | 70.0(4)  |
| O(25)-Nd(5)-O(32) | 75.9(4)  | O(35)-Nd(7)-O(46) | 114.9(4) |
| O(31)-Nd(5)-O(32) | 140.2(4) | O(51)-Nd(7)-O(46) | 76.1(4)  |
| O(39)-Nd(5)-O(32) | 71.9(5)  | O(36)-Nd(7)-O(49) | 109.8(4) |
| O(50)-Nd(5)-O(32) | 142.6(4) | O(30)-Nd(7)-O(49) | 82.4(4)  |
| O(30)-Nd(5)-O(32) | 132.1(4) | O(50)-Nd(7)-O(49) | 144.8(4) |
| O(24)-Nd(5)-O(32) | 73.9(4)  | O(35)-Nd(7)-O(49) | 78.4(4)  |
| O(34)-Nd(6)-O(28) | 82.1(4)  | O(51)-Nd(7)-O(49) | 74.2(4)  |
| O(34)-Nd(6)-O(5)  | 140.1(4) | O(46)-Nd(7)-O(49) | 141.3(4) |
| O(28)-Nd(6)-O(5)  | 76.3(4)  | O(36)-Nd(7)-O(11) | 75.2(4)  |
| O(34)-Nd(6)-O(23) | 135.6(4) | O(30)-Nd(7)-O(11) | 133.1(4) |
| O(28)-Nd(6)-O(23) | 82.6(4)  | O(50)-Nd(7)-O(11) | 142.6(4) |
| O(5)-Nd(6)-O(23)  | 74.4(4)  | O(35)-Nd(7)-O(11) | 138.1(4) |
| O(34)-Nd(6)-O(6)  | 71.9(3)  | O(51)-Nd(7)-O(11) | 71.4(3)  |
| O(28)-Nd(6)-O(6)  | 74.0(4)  | O(46)-Nd(7)-O(11) | 74.8(4)  |
| O(5)-Nd(6)-O(6)   | 70.1(4)  | O(49)-Nd(7)-O(11) | 72.6(4)  |
| O(23)-Nd(6)-O(6)  | 141.1(4) | O(51)-Nd(8)-O(47) | 91.5(4)  |
| O(34)-Nd(6)-O(26) | 84.1(4)  | O(51)-Nd(8)-O(13) | 70.9(5)  |
| O(28)-Nd(6)-O(26) | 139.3(4) | O(47)-Nd(8)-O(13) | 135.1(5) |
| O(5)-Nd(6)-O(26)  | 133.0(4) | O(51)-Nd(8)-O(8)  | 152.3(4) |
| O(23)-Nd(6)-O(26) | 80.9(4)  | O(47)-Nd(8)-O(8)  | 82.1(5)  |
| O(6)-Nd(6)-O(26)  | 136.1(4) | O(13)-Nd(8)-O(8)  | 94.8(5)  |
| O(34)-Nd(6)-O(43) | 70.9(3)  | O(51)-Nd(8)-O(9)  | 139.7(4) |
| O(28)-Nd(6)-O(43) | 136.9(3) | O(47)-Nd(8)-O(9)  | 128.8(4) |
| O(5)-Nd(6)-O(43)  | 103.6(4) | O(13)-Nd(8)-O(9)  | 78.1(5)  |
| O(23)-Nd(6)-O(43) | 139.7(4) | O(8)-Nd(8)-O(9)   | 52.9(5)  |
| O(6)-Nd(6)-O(43)  | 66.1(3)  | O(51)-Nd(8)-O(45) | 76.0(4)  |
| O(26)-Nd(6)-O(43) | 71.6(4)  | O(47)-Nd(8)-O(45) | 139.2(5) |
| O(34)-Nd(6)-O(24) | 83.7(3)  | O(13)-Nd(8)-O(45) | 77.6(5)  |
| O(28)-Nd(6)-O(24) | 72.7(4)  | O(8)-Nd(8)-O(45)  | 125.3(5) |
| O(5)-Nd(6)-O(24)  | 120.0(4) | O(9)-Nd(8)-O(45)  | 72.6(4)  |

|                   |          |                   |          |
|-------------------|----------|-------------------|----------|
| O(51)-Nd(8)-O(10) | 119.9(4) | O(3)-Nd(9)-O(30)  | 130.1(4) |
| O(47)-Nd(8)-O(10) | 74.7(5)  | O(48)-Nd(9)-O(30) | 80.2(4)  |
| O(13)-Nd(8)-O(10) | 150.0(5) | O(31)-Nd(9)-O(30) | 71.6(3)  |
| O(8)-Nd(8)-O(10)  | 84.5(5)  | O(3)-Nd(9)-O(29)  | 80.9(6)  |
| O(9)-Nd(8)-O(10)  | 77.7(5)  | O(48)-Nd(9)-O(29) | 86.2(6)  |
| O(45)-Nd(8)-O(10) | 78.5(5)  | O(31)-Nd(9)-O(29) | 103.5(5) |
| O(51)-Nd(8)-O(11) | 69.9(3)  | O(30)-Nd(9)-O(29) | 141.8(5) |
| O(47)-Nd(8)-O(11) | 72.5(4)  | O(3)-Nd(9)-O(38)  | 79.0(5)  |
| O(13)-Nd(8)-O(11) | 131.8(4) | O(48)-Nd(9)-O(38) | 89.4(5)  |
| O(8)-Nd(8)-O(11)  | 132.0(4) | O(31)-Nd(9)-O(38) | 101.5(4) |
| O(9)-Nd(8)-O(11)  | 117.9(4) | O(30)-Nd(9)-O(38) | 73.8(4)  |
| O(45)-Nd(8)-O(11) | 66.7(4)  | O(29)-Nd(9)-O(38) | 142.0(5) |
| O(10)-Nd(8)-O(11) | 50.1(4)  | O(3)-Nd(9)-O(35)  | 128.4(4) |
| O(51)-Nd(8)-O(14) | 68.3(3)  | O(48)-Nd(9)-O(35) | 81.8(4)  |
| O(47)-Nd(8)-O(14) | 69.8(4)  | O(31)-Nd(9)-O(35) | 69.4(3)  |
| O(13)-Nd(8)-O(14) | 65.3(4)  | O(30)-Nd(9)-O(35) | 68.9(4)  |
| O(8)-Nd(8)-O(14)  | 84.3(4)  | O(29)-Nd(9)-O(35) | 73.9(5)  |
| O(9)-Nd(8)-O(14)  | 120.5(4) | O(38)-Nd(9)-O(35) | 142.6(4) |
| O(45)-Nd(8)-O(14) | 134.8(4) | O(3)-Nd(9)-O(4)   | 64.5(4)  |
| O(10)-Nd(8)-O(14) | 143.8(4) | O(48)-Nd(9)-O(4)  | 76.3(4)  |
| O(11)-Nd(8)-O(14) | 121.5(3) | O(31)-Nd(9)-O(4)  | 138.5(4) |
| O(3)-Nd(9)-O(48)  | 140.8(4) | O(30)-Nd(9)-O(4)  | 136.7(4) |
| O(3)-Nd(9)-O(31)  | 74.0(4)  | O(29)-Nd(9)-O(4)  | 72.2(5)  |
| O(48)-Nd(9)-O(31) | 145.2(4) | O(38)-Nd(9)-O(4)  | 70.1(4)  |

---

**Table S2.** Selected bond lengths (Å) and angles (°) for **2**.

|             |           |                   |           |
|-------------|-----------|-------------------|-----------|
| Gd(1)-O(27) | 2.275(11) | Gd(7)-O(35)       | 2.294(9)  |
| Gd(1)-O(50) | 2.309(10) | Gd(7)-O(36)       | 2.323(12) |
| Gd(1)-O(35) | 2.341(10) | Gd(7)-O(50)       | 2.323(10) |
| Gd(1)-O(22) | 2.364(12) | Gd(7)-O(30)       | 2.331(11) |
| Gd(1)-O(34) | 2.373(11) | Gd(7)-O(46)       | 2.354(12) |
| Gd(1)-O(33) | 2.390(11) | Gd(7)-O(51)       | 2.358(11) |
| Gd(1)-O(20) | 2.405(10) | Gd(7)-O(49)       | 2.396(12) |
| Gd(1)-O(31) | 2.415(10) | Gd(7)-O(11)       | 2.421(11) |
| Gd(2)-O(2)  | 2.288(12) | Gd(8)-O(51)       | 2.301(10) |
| Gd(2)-O(43) | 2.306(11) | Gd(8)-O(13)       | 2.305(14) |
| Gd(2)-O(41) | 2.329(10) | Gd(8)-O(8)        | 2.347(14) |
| Gd(2)-O(33) | 2.340(11) | Gd(8)-O(47)       | 2.355(13) |
| Gd(2)-O(6)  | 2.372(12) | Gd(8)-O(10)       | 2.398(12) |
| Gd(2)-O(42) | 2.412(12) | Gd(8)-O(45)       | 2.429(13) |
| Gd(2)-O(34) | 2.431(10) | Gd(8)-O(9)        | 2.474(14) |
| Gd(2)-N(1)  | 2.592(14) | Gd(8)-O(11)       | 2.505(13) |
| Gd(2)-O(7)  | 2.694(14) | Gd(8)-O(14)       | 2.624(11) |
| Gd(3)-O(18) | 2.268(12) | Gd(9)-O(3)        | 2.246(14) |
| Gd(3)-O(16) | 2.304(14) | Gd(9)-O(48)       | 2.282(12) |
| Gd(3)-O(12) | 2.329(13) | Gd(9)-O(31)       | 2.294(10) |
| Gd(3)-O(51) | 2.348(10) | Gd(9)-O(30)       | 2.340(10) |
| Gd(3)-O(20) | 2.393(11) | Gd(9)-O(38)       | 2.343(13) |
| Gd(3)-O(14) | 2.419(12) | Gd(9)-O(29)       | 2.394(14) |
| Gd(3)-O(22) | 2.442(13) | Gd(9)-O(35)       | 2.398(10) |
| Gd(3)-O(21) | 2.472(14) | Gd(9)-O(4)        | 2.568(13) |
| Gd(3)-O(13) | 2.924(15) | O(27)-Gd(1)-O(50) | 141.5(4)  |
| Gd(4)-O(15) | 2.294(13) | O(27)-Gd(1)-O(35) | 112.1(4)  |
| Gd(4)-O(20) | 2.319(11) | O(50)-Gd(1)-O(35) | 67.2(4)   |
| Gd(4)-O(33) | 2.341(11) | O(27)-Gd(1)-O(22) | 80.4(4)   |
| Gd(4)-O(40) | 2.372(12) | O(50)-Gd(1)-O(22) | 131.2(4)  |
| Gd(4)-O(2)  | 2.390(12) | O(35)-Gd(1)-O(22) | 74.4(4)   |
| Gd(4)-O(18) | 2.444(12) | O(27)-Gd(1)-O(34) | 80.3(4)   |
| Gd(4)-O(19) | 2.483(13) | O(50)-Gd(1)-O(34) | 80.8(4)   |
| Gd(4)-O(41) | 2.505(12) | O(35)-Gd(1)-O(34) | 142.0(4)  |
| Gd(4)-O(1)  | 2.579(12) | O(22)-Gd(1)-O(34) | 143.5(4)  |
| Gd(5)-O(31) | 2.255(10) | O(27)-Gd(1)-O(33) | 81.2(4)   |
| Gd(5)-O(37) | 2.278(11) | O(50)-Gd(1)-O(33) | 123.6(4)  |
| Gd(5)-O(39) | 2.312(13) | O(35)-Gd(1)-O(33) | 143.4(4)  |
| Gd(5)-O(25) | 2.361(12) | O(22)-Gd(1)-O(33) | 74.6(4)   |
| Gd(5)-O(30) | 2.374(12) | O(34)-Gd(1)-O(33) | 71.9(4)   |
| Gd(5)-O(50) | 2.378(10) | O(27)-Gd(1)-O(20) | 141.1(4)  |
| Gd(5)-O(24) | 2.400(11) | O(50)-Gd(1)-O(20) | 77.3(3)   |
| Gd(5)-O(32) | 2.409(13) | O(35)-Gd(1)-O(20) | 82.2(4)   |
| Gd(6)-O(34) | 2.280(10) | O(22)-Gd(1)-O(20) | 68.7(4)   |
| Gd(6)-O(26) | 2.338(13) | O(34)-Gd(1)-O(20) | 111.1(4)  |
| Gd(6)-O(28) | 2.343(11) | O(33)-Gd(1)-O(20) | 68.6(4)   |
| Gd(6)-O(23) | 2.388(12) | O(27)-Gd(1)-O(31) | 77.0(4)   |
| Gd(6)-O(5)  | 2.396(11) | O(50)-Gd(1)-O(31) | 67.2(4)   |
| Gd(6)-O(43) | 2.397(11) | O(35)-Gd(1)-O(31) | 67.7(4)   |
| Gd(6)-O(6)  | 2.429(13) | O(22)-Gd(1)-O(31) | 123.4(4)  |
| Gd(6)-O(24) | 2.514(12) | O(34)-Gd(1)-O(31) | 81.6(3)   |
| Gd(6)-O(44) | 2.615(13) | O(33)-Gd(1)-O(31) | 148.0(4)  |

|                   |          |                   |          |
|-------------------|----------|-------------------|----------|
| O(20)-Gd(1)-O(31) | 140.0(3) | O(51)-Gd(3)-O(22) | 107.4(4) |
| O(2)-Gd(2)-O(43)  | 144.9(4) | O(20)-Gd(3)-O(22) | 67.6(4)  |
| O(2)-Gd(2)-O(41)  | 74.5(4)  | O(14)-Gd(3)-O(22) | 143.2(4) |
| O(43)-Gd(2)-O(41) | 100.1(4) | O(18)-Gd(3)-O(21) | 72.7(4)  |
| O(2)-Gd(2)-O(33)  | 69.9(4)  | O(16)-Gd(3)-O(21) | 72.8(5)  |
| O(43)-Gd(2)-O(33) | 141.4(4) | O(12)-Gd(3)-O(21) | 79.9(5)  |
| O(41)-Gd(2)-O(33) | 68.8(4)  | O(51)-Gd(3)-O(21) | 140.0(4) |
| O(2)-Gd(2)-O(6)   | 137.2(5) | O(20)-Gd(3)-O(21) | 114.2(4) |
| O(43)-Gd(2)-O(6)  | 68.8(4)  | O(14)-Gd(3)-O(21) | 146.8(4) |
| O(41)-Gd(2)-O(6)  | 137.9(4) | O(22)-Gd(3)-O(21) | 52.1(4)  |
| O(33)-Gd(2)-O(6)  | 94.3(4)  | O(18)-Gd(3)-O(13) | 125.6(4) |
| O(2)-Gd(2)-O(42)  | 74.2(5)  | O(16)-Gd(3)-O(13) | 75.7(4)  |
| O(43)-Gd(2)-O(42) | 71.1(4)  | O(12)-Gd(3)-O(13) | 48.0(4)  |
| O(41)-Gd(2)-O(42) | 73.0(4)  | O(51)-Gd(3)-O(13) | 62.5(4)  |
| O(33)-Gd(2)-O(42) | 132.9(4) | O(20)-Gd(3)-O(13) | 127.7(4) |
| O(6)-Gd(2)-O(42)  | 132.7(4) | O(14)-Gd(3)-O(13) | 60.7(4)  |
| O(2)-Gd(2)-O(34)  | 133.5(4) | O(22)-Gd(3)-O(13) | 153.0(4) |
| O(43)-Gd(2)-O(34) | 69.9(4)  | O(21)-Gd(3)-O(13) | 118.1(4) |
| O(41)-Gd(2)-O(34) | 67.7(4)  | C(87)-Gd(3)-O(13) | 140.0(5) |
| O(33)-Gd(2)-O(34) | 71.8(4)  | O(15)-Gd(4)-O(20) | 82.8(4)  |
| O(6)-Gd(2)-O(34)  | 70.4(4)  | O(15)-Gd(4)-O(33) | 150.0(4) |
| O(42)-Gd(2)-O(34) | 117.2(4) | O(20)-Gd(4)-O(33) | 70.9(4)  |
| O(2)-Gd(2)-N(1)   | 75.2(4)  | O(15)-Gd(4)-O(40) | 74.4(5)  |
| O(43)-Gd(2)-N(1)  | 89.3(4)  | O(20)-Gd(4)-O(40) | 90.5(4)  |
| O(41)-Gd(2)-N(1)  | 139.1(4) | O(33)-Gd(4)-O(40) | 118.7(4) |
| O(33)-Gd(2)-N(1)  | 123.8(4) | O(15)-Gd(4)-O(2)  | 140.8(4) |
| O(6)-Gd(2)-N(1)   | 82.6(4)  | O(20)-Gd(4)-O(2)  | 135.6(4) |
| O(42)-Gd(2)-N(1)  | 72.7(5)  | O(33)-Gd(4)-O(2)  | 68.2(4)  |
| O(34)-Gd(2)-N(1)  | 150.4(4) | O(40)-Gd(4)-O(2)  | 94.4(5)  |
| O(2)-Gd(2)-O(7)   | 76.7(4)  | O(15)-Gd(4)-O(18) | 70.0(4)  |
| O(43)-Gd(2)-O(7)  | 126.1(4) | O(20)-Gd(4)-O(18) | 69.9(4)  |
| O(41)-Gd(2)-O(7)  | 129.9(4) | O(33)-Gd(4)-O(18) | 87.3(4)  |
| O(33)-Gd(2)-O(7)  | 63.2(4)  | O(40)-Gd(4)-O(18) | 140.9(4) |
| O(6)-Gd(2)-O(7)   | 60.9(4)  | O(2)-Gd(4)-O(18)  | 123.5(4) |
| O(42)-Gd(2)-O(7)  | 134.9(4) | O(15)-Gd(4)-O(19) | 89.6(5)  |
| O(34)-Gd(2)-O(7)  | 107.9(4) | O(20)-Gd(4)-O(19) | 121.2(4) |
| N(1)-Gd(2)-O(7)   | 66.9(4)  | O(33)-Gd(4)-O(19) | 92.1(4)  |
| O(18)-Gd(3)-O(16) | 145.3(5) | O(40)-Gd(4)-O(19) | 142.7(5) |
| O(18)-Gd(3)-O(12) | 88.7(5)  | O(2)-Gd(4)-O(19)  | 77.0(4)  |
| O(16)-Gd(3)-O(12) | 89.5(5)  | O(18)-Gd(4)-O(19) | 53.0(4)  |
| O(18)-Gd(3)-O(51) | 143.1(4) | O(15)-Gd(4)-O(41) | 123.5(4) |
| O(16)-Gd(3)-O(51) | 68.8(4)  | O(20)-Gd(4)-O(41) | 78.7(4)  |
| O(12)-Gd(3)-O(51) | 110.4(4) | O(33)-Gd(4)-O(41) | 65.9(4)  |
| O(18)-Gd(3)-O(20) | 71.7(4)  | O(40)-Gd(4)-O(41) | 53.1(4)  |
| O(16)-Gd(3)-O(20) | 119.8(4) | O(2)-Gd(4)-O(41)  | 69.6(4)  |
| O(12)-Gd(3)-O(20) | 149.7(4) | O(18)-Gd(4)-O(41) | 144.1(4) |
| O(51)-Gd(3)-O(20) | 76.9(4)  | O(19)-Gd(4)-O(41) | 144.8(4) |
| O(18)-Gd(3)-O(14) | 82.3(4)  | O(15)-Gd(4)-O(1)  | 76.1(4)  |
| O(16)-Gd(3)-O(14) | 131.0(4) | O(20)-Gd(4)-O(1)  | 156.8(4) |
| O(12)-Gd(3)-O(14) | 78.0(5)  | O(33)-Gd(4)-O(1)  | 131.9(4) |
| O(51)-Gd(3)-O(14) | 71.8(4)  | O(40)-Gd(4)-O(1)  | 75.0(4)  |
| O(20)-Gd(3)-O(14) | 76.8(4)  | O(2)-Gd(4)-O(1)   | 64.8(4)  |
| O(18)-Gd(3)-O(22) | 78.3(4)  | O(18)-Gd(4)-O(1)  | 110.4(4) |
| O(16)-Gd(3)-O(22) | 77.4(4)  | O(19)-Gd(4)-O(1)  | 68.5(4)  |
| O(12)-Gd(3)-O(22) | 131.9(5) | O(41)-Gd(4)-O(1)  | 105.3(4) |



|                   |          |                   |          |
|-------------------|----------|-------------------|----------|
| O(31)-Gd(5)-O(37) | 145.9(4) | O(6)-Gd(6)-O(24)  | 139.9(4) |
| O(31)-Gd(5)-O(39) | 87.7(4)  | O(34)-Gd(6)-O(44) | 129.8(4) |
| O(37)-Gd(5)-O(39) | 96.9(5)  | O(26)-Gd(6)-O(44) | 65.5(4)  |
| O(31)-Gd(5)-O(25) | 110.4(4) | O(28)-Gd(6)-O(44) | 145.7(4) |
| O(37)-Gd(5)-O(25) | 84.0(5)  | O(23)-Gd(6)-O(44) | 79.0(4)  |
| O(39)-Gd(5)-O(25) | 146.2(5) | O(5)-Gd(6)-O(44)  | 70.6(4)  |
| O(31)-Gd(5)-O(30) | 69.5(3)  | O(43)-Gd(6)-O(44) | 61.9(4)  |
| O(37)-Gd(5)-O(30) | 79.2(4)  | O(6)-Gd(6)-O(44)  | 102.3(4) |
| O(39)-Gd(5)-O(30) | 74.4(4)  | O(24)-Gd(6)-O(44) | 117.7(4) |
| O(25)-Gd(5)-O(30) | 138.1(4) | O(35)-Gd(7)-O(36) | 143.8(4) |
| O(31)-Gd(5)-O(50) | 68.7(4)  | O(35)-Gd(7)-O(50) | 67.7(4)  |
| O(37)-Gd(5)-O(50) | 87.7(4)  | O(36)-Gd(7)-O(50) | 88.4(4)  |
| O(39)-Gd(5)-O(50) | 140.8(4) | O(35)-Gd(7)-O(30) | 68.5(4)  |
| O(25)-Gd(5)-O(50) | 73.0(4)  | O(36)-Gd(7)-O(30) | 78.1(4)  |
| O(30)-Gd(5)-O(50) | 68.2(4)  | O(50)-Gd(7)-O(30) | 69.9(4)  |
| O(31)-Gd(5)-O(24) | 69.3(4)  | O(35)-Gd(7)-O(46) | 113.4(4) |
| O(37)-Gd(5)-O(24) | 144.7(4) | O(36)-Gd(7)-O(46) | 80.7(5)  |
| O(39)-Gd(5)-O(24) | 83.0(5)  | O(50)-Gd(7)-O(46) | 69.9(4)  |
| O(25)-Gd(5)-O(24) | 77.5(4)  | O(30)-Gd(7)-O(46) | 134.6(4) |
| O(30)-Gd(5)-O(24) | 133.3(4) | O(35)-Gd(7)-O(51) | 74.0(4)  |
| O(50)-Gd(5)-O(24) | 114.5(4) | O(36)-Gd(7)-O(51) | 142.0(4) |
| O(31)-Gd(5)-O(32) | 140.9(4) | O(50)-Gd(7)-O(51) | 112.2(3) |
| O(37)-Gd(5)-O(32) | 71.6(5)  | O(30)-Gd(7)-O(51) | 138.1(4) |
| O(39)-Gd(5)-O(32) | 72.8(5)  | O(46)-Gd(7)-O(51) | 77.5(4)  |
| O(25)-Gd(5)-O(32) | 75.5(4)  | O(35)-Gd(7)-O(49) | 81.0(4)  |
| O(30)-Gd(5)-O(32) | 132.4(4) | O(36)-Gd(7)-O(49) | 109.1(5) |
| O(50)-Gd(5)-O(32) | 143.8(4) | O(50)-Gd(7)-O(49) | 144.5(4) |
| O(24)-Gd(5)-O(32) | 74.8(4)  | O(30)-Gd(7)-O(49) | 83.4(4)  |
| O(34)-Gd(6)-O(26) | 84.6(4)  | O(46)-Gd(7)-O(49) | 141.7(4) |
| O(34)-Gd(6)-O(28) | 82.3(4)  | O(51)-Gd(7)-O(49) | 72.7(4)  |
| O(26)-Gd(6)-O(28) | 139.7(4) | O(35)-Gd(7)-O(11) | 139.3(4) |
| O(34)-Gd(6)-O(23) | 135.9(4) | O(36)-Gd(7)-O(11) | 75.2(4)  |
| O(26)-Gd(6)-O(23) | 79.3(4)  | O(50)-Gd(7)-O(11) | 143.9(4) |
| O(28)-Gd(6)-O(23) | 84.1(4)  | O(30)-Gd(7)-O(11) | 134.5(4) |
| O(34)-Gd(6)-O(5)  | 140.3(4) | O(46)-Gd(7)-O(11) | 75.7(4)  |
| O(26)-Gd(6)-O(5)  | 132.3(4) | O(51)-Gd(7)-O(11) | 69.4(4)  |
| O(28)-Gd(6)-O(5)  | 76.2(4)  | O(49)-Gd(7)-O(11) | 71.6(4)  |
| O(23)-Gd(6)-O(5)  | 74.7(4)  | O(51)-Gd(8)-O(10) | 121.1(4) |
| O(34)-Gd(6)-O(43) | 71.0(4)  | O(13)-Gd(8)-O(10) | 148.7(5) |
| O(26)-Gd(6)-O(43) | 71.5(4)  | O(8)-Gd(8)-O(10)  | 83.1(5)  |
| O(28)-Gd(6)-O(43) | 137.0(4) | O(47)-Gd(8)-O(10) | 73.3(5)  |
| O(23)-Gd(6)-O(43) | 138.1(4) | O(51)-Gd(8)-O(45) | 75.3(4)  |
| O(5)-Gd(6)-O(43)  | 103.6(4) | O(13)-Gd(8)-O(45) | 77.7(5)  |
| O(34)-Gd(6)-O(6)  | 72.0(4)  | O(8)-Gd(8)-O(45)  | 125.8(5) |
| O(26)-Gd(6)-O(6)  | 136.6(4) | O(47)-Gd(8)-O(45) | 138.6(5) |
| O(28)-Gd(6)-O(6)  | 73.7(4)  | O(10)-Gd(8)-O(45) | 80.4(5)  |
| O(23)-Gd(6)-O(6)  | 141.9(4) | O(51)-Gd(8)-O(9)  | 140.8(4) |
| O(5)-Gd(6)-O(6)   | 70.1(4)  | O(13)-Gd(8)-O(9)  | 76.5(5)  |
| O(43)-Gd(6)-O(6)  | 66.5(4)  | O(8)-Gd(8)-O(9)   | 52.5(5)  |
| O(34)-Gd(6)-O(24) | 83.0(4)  | O(47)-Gd(8)-O(9)  | 127.6(5) |
| O(26)-Gd(6)-O(24) | 68.5(4)  | O(10)-Gd(8)-O(9)  | 76.0(5)  |
| O(28)-Gd(6)-O(24) | 72.2(4)  | O(45)-Gd(8)-O(9)  | 73.5(5)  |
| O(23)-Gd(6)-O(24) | 52.9(4)  | O(51)-Gd(8)-O(11) | 68.9(4)  |
| O(5)-Gd(6)-O(24)  | 120.2(4) | O(13)-Gd(8)-O(11) | 134.0(5) |
| O(43)-Gd(6)-O(24) | 133.8(4) | O(8)-Gd(8)-O(11)  | 132.8(5) |

|                   |          |                   |          |
|-------------------|----------|-------------------|----------|
| O(47)-Gd(8)-O(11) | 71.4(4)  | O(31)-Gd(9)-O(38) | 100.9(4) |
| O(10)-Gd(8)-O(11) | 52.3(4)  | O(30)-Gd(9)-O(38) | 74.6(4)  |
| O(45)-Gd(8)-O(11) | 67.3(4)  | O(3)-Gd(9)-O(29)  | 80.2(5)  |
| O(9)-Gd(8)-O(11)  | 118.2(4) | O(48)-Gd(9)-O(29) | 88.2(5)  |
| O(51)-Gd(8)-O(14) | 68.8(4)  | O(31)-Gd(9)-O(29) | 103.7(5) |
| O(13)-Gd(8)-O(14) | 67.0(4)  | O(30)-Gd(9)-O(29) | 142.5(4) |
| O(8)-Gd(8)-O(14)  | 83.8(4)  | O(38)-Gd(9)-O(29) | 141.3(5) |
| O(47)-Gd(8)-O(14) | 69.8(4)  | O(3)-Gd(9)-O(35)  | 130.0(4) |
| O(10)-Gd(8)-O(14) | 142.1(4) | O(48)-Gd(9)-O(35) | 82.6(4)  |
| O(45)-Gd(8)-O(14) | 134.8(4) | O(31)-Gd(9)-O(35) | 68.7(4)  |
| O(9)-Gd(8)-O(14)  | 121.3(4) | O(30)-Gd(9)-O(35) | 66.6(3)  |
| O(11)-Gd(8)-O(14) | 120.3(4) | O(38)-Gd(9)-O(35) | 141.0(4) |
| O(3)-Gd(9)-O(48)  | 140.1(5) | O(29)-Gd(9)-O(35) | 76.5(4)  |
| O(3)-Gd(9)-O(31)  | 75.0(4)  | O(3)-Gd(9)-O(4)   | 65.4(5)  |
| O(48)-Gd(9)-O(31) | 144.9(4) | O(48)-Gd(9)-O(4)  | 74.7(5)  |
| O(3)-Gd(9)-O(30)  | 129.1(5) | O(31)-Gd(9)-O(4)  | 140.2(4) |
| O(48)-Gd(9)-O(30) | 81.0(4)  | O(30)-Gd(9)-O(4)  | 136.1(4) |
| O(31)-Gd(9)-O(30) | 69.4(4)  | O(38)-Gd(9)-O(4)  | 68.9(5)  |
| O(3)-Gd(9)-O(38)  | 77.9(5)  | O(29)-Gd(9)-O(4)  | 73.1(5)  |
| O(48)-Gd(9)-O(38) | 88.6(5)  | O(35)-Gd(9)-O(4)  | 142.3(4) |

---
